1 *Population-specific effects of ocean acidification in the Olympia oyster*

2

3 **Authors:** Laura H Spencer<sup>1</sup>, Katherine Silliman<sup>2</sup>, Steven Roberts<sup>1</sup>

4

5 <sup>1</sup>University of Washington, School of Aquatic and Fishery Sciences, 1122 NE Boat St, Seattle,

6 WA 98105, United States

7 <sup>2</sup>Northern Gulf Institute, Mississippi State University, Starkville, Mississippi, USA

8

9 **Corresponding author:**

10 Laura H Spencer

11 lhs3@uw.edu

## 12 **Abstract**

13 Populations of marine species that respond differently to ocean acidification offer natural  
14 reservoirs of biodiversity that can be leveraged for conservation efforts and to sustain marine  
15 food systems. The molecular and physiological traits associated with tolerance to acidification  
16 must first be identified. This study leveraged oysters from three phenotypically distinct  
17 populations of the Olympia oyster, *Ostrea lurida*, but that were bred and reared in common  
18 conditions for four years. We assessed their growth, reproductive development, and  
19 transcriptional response to acidification within and across generations. Responses reveal  
20 energetic trade-offs that reflect unique phenotypes previously observed among populations. The  
21 population with the slowest growth but high survival rates, oysters from Dabob Bay, mounted  
22 the largest transcriptional response to acidification without effects to growth and reproduction. A  
23 moderate response was observed in the population with fastest growth rate but lowest fecundity  
24 (Fidalgo Bay). Oyster Bay, the population with highest fecundity but lowest survival rates, did  
25 not respond at the transcript level. Oyster Bay was also the only population for which  
26 acidification negatively affected growth and reproductive development. While exposure to  
27 acidification did not affect gene expression in the next generation's larval stage, it did result in  
28 larger larvae in the Oyster Bay population, which could partially alleviate negative effects of  
29 acidification in the wild for that population. Given the distinct transcriptional response of the  
30 Dabob Bay population to acidification and its high survival rates in previous studies, we then  
31 identified genes that were uniquely expressed in Dabob Bay oysters compared to the other  
32 populations. Genes involved in antibacterial and antiviral processes, metabolism, growth, and  
33 reproduction were uniquely expressed in Dabob Bay, and many similar functions were identified  
34 in both adults and larvae, which provides insight into the mechanisms behind a stress-tolerant

35 oyster population. The population-specific phenotypes and responses to acidification illustrate  
36 the diversity of physiological strategies in *O. lurida* that balance the energetic demands of  
37 growth, reproduction, cellular maintenance, and offspring viability. Taken together this study  
38 reveals that there are distinct phenotypes among marine invertebrate populations on small  
39 geographic scales with implications for species resilience to acidification and other  
40 environmental stressors.

41

## 42 **Introduction**

43 Following observations of shifting ocean conditions (IPCC, 2019) an enormous scientific effort  
44 has explored the response of marine species to ocean acidification (Riebesell & Gattuso, 2014).  
45 Empirical data has established that many species are vulnerable to ocean conditions projected for  
46 this century, particularly calcifying invertebrates, affecting a range of physiological processes  
47 over the lifetime of an organism, including development, recruitment, growth, reproduction, and  
48 survival (Gazeau et al., 2013; Kroeker et al., 2013; Lemasson et al., 2017; Melzner et al., 2019).  
49 However, these studies also indicate that biological responses are quite variable, related to an  
50 organism's genetic and environmental ancestries (Eirin-Lopez & Putnam, 2019; He & Silliman,  
51 2019; Przeslawski et al., 2015; Sunday et al., 2014). Some species are more tolerant to the effects  
52 of acidification than others (Branch et al., 2013; Figuerola et al., 2021), as are some populations  
53 within species (Bitter et al. 2019; Swezey et al. 2020; Kelly et al. 2013; Vargas et al. 2017).  
54 There is also evidence of intergenerational (spanning one generation) and transgenerational  
55 (spanning 2+ generations) plasticity, which may buffer future populations against challenging  
56 conditions (Salinas et al., 2013; Zhao et al., 2020). Ultimately, there will be a spectrum of  
57 responses to shifting ocean chemistry, dependent on species' capacity to mitigate, acclimatize,

58 and adapt to shifting conditions. For effective conservation and management of marine calcifiers,  
59 it is critical to identify the genotypes, phenotypes, and molecular mechanisms that impart  
60 tolerance to acidification, as well as quantify the range of responses within taxa.

61         Impacts of acidification to oysters were among the earliest observations of negative  
62 biological effects. Now, in an effort to build resilient commercial and wild stocks, breeding  
63 programs and researchers are increasingly seeking to identify oyster species and populations that  
64 are tolerant to acidification and other stressors. One such group of oysters appears to be species  
65 from the genus *Ostrea*, which includes the Olympia (*O. lurida*), European flat (*O. edulis*),  
66 Chilean flat (*O. chilensis*), and Australian flat oyster (*O. angasi*). Multiple studies have reported  
67 little to no effects of acidification in *Ostrea* spp. at the adult (Lemasson et al., 2018; Lemasson et  
68 al., 2019; Lemasson & Knights, 2021), juvenile (Navarro et al., 2020), and larval stages (Cole et  
69 al., 2016; Pereira et al., 2019; Waldbusser et al., 2016). In one study *O. edulis* larval growth and  
70 survival responded positively to acidification exposure (Prado et al., 2016). Unique *Ostrea* spp.  
71 life history traits, in particular brooding of veliger larvae in the maternal pallial cavity, may  
72 contribute to the species' relative tolerance to acidification, as pH can quickly decrease to levels  
73 as low as 6.96 during periods of valve closures (Chaparro et al., 2009; Gray et al., 2019). There  
74 are, however, other studies that have observed negative effects of acidification in *Ostrea*, such as  
75 decreased larval growth in *O. lurida* that persist to the juvenile stage (Hettinger et al., 2012,  
76 2013; Sanford et al., 2014). Contrasting effects could be explained by population-specific  
77 responses, which are commonly observed in marine invertebrate taxa (Barber et al., 1991;  
78 Macdonald & Thompson, 1988). Indeed, populations of *O. lurida* from northern California have  
79 diverged salinity tolerances, which is facilitated by distinct physiological responses at the  
80 cellular level (cell death regulation, mantle ciliary activity) (Maynard et al., 2018). Molecular

81 strategies of *Ostrea* spp. need closer examination to understand the functions that enable  
82 tolerance to acidified conditions in some, but not all, populations (Melzner et al., 2009).

83         Previous studies have identified a suite of molecular functions in marine calcifiers that  
84 are sensitive to ocean acidification, which has been thoroughly reviewed by Melzner et al. (2019)  
85 and Strader et al. (2020). Interestingly, the directionality and magnitude of molecular responses  
86 can differ by species and/or populations within the same species. Opposing changes in  
87 antioxidants and molecular chaperones have been reported for acidification-tolerant  
88 (upregulated) and wild-type (downregulated) Sydney rock oysters in acidified conditions, which  
89 then reverse in subsequent generations (Goncalves et al., 2016, 2017). Changes to transcripts  
90 associated with energy production provide evidence for both metabolic depression and increased  
91 metabolic demand in response to acidification (Strader et al., 2020). In some cases the degree of  
92 transcriptional plasticity varies in response to acidification (Kenkel & Matz, 2017). For instance,  
93 upon exposure to acidification, transcripts for genes related to ATP production increased in two  
94 populations of urchins, but the magnitude of increase was more pronounced in the population  
95 that experiences more frequent periods of low pH compared to those from more stable pH  
96 environments (Evans et al., 2017). These studies highlight the variety of molecular responses to  
97 acidification that can occur among populations of the same species. It is vital to identify the  
98 fundamental molecular signatures of acidification-tolerant oysters to inform breeding and  
99 conservation efforts.

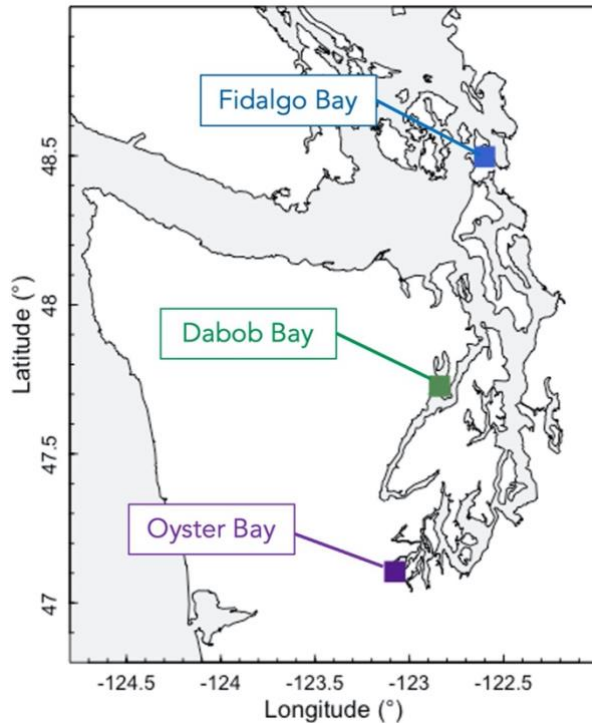

**Figure 1:** Location of the focal *O. lurida* populations in the greater Puget Sound estuary, Washington, USA

110

111 In the present study we examine effects of acidification on multiple populations of the  
112 Olympia oyster, *Ostrea lurida*. *O. lurida* is native to the North American Pacific Coast,  
113 inhabiting dynamic estuarine environments that are influenced by coastal upwelling and ocean  
114 acidification (Feely et al., 2010; McGraw, 2009; Reum et al., 2014). We build upon previous  
115 studies that have identified unique fitness traits in three populations from disparate regions of  
116 greater Puget Sound in Washington State (Figure 1, Table 1) (Heare et al., 2017; Heare et al.,  
117 2018; Silliman et al., 2018; Spencer et al., 2020; White et al., 2017). Oysters derived from Oyster  
118 Bay in the South Puget Sound are highly fecund, and compared to other populations require  
119 fewer degree-days to begin reproducing (Heare et al., 2017; Silliman et al., 2018; Spencer et al.,  
120 2020). Oysters from Dabob Bay in the Hood Canal basin consistently display slower growth than  
121 other populations but have higher survival rates in field testing and during hatchery rearing  
122 (Heare et al., 2017; Spencer et al., 2020, Ryan Crim, *pers. comm.*). Those from Fidalgo Bay, a

123 small basin in the northern reaches of greater Puget Sound, grow faster and are less fecund or  
124 have delayed reproduction (Heare et al., 2017; Silliman et al., 2018; Spencer et al., 2020).

125         Here, we use high-throughput sequencing to perform the first transcriptional  
126 characterization of an *Ostrea* species to ocean acidification. Expression analyses are paired with  
127 biometric data (gonad development, growth) to capture system-wide changes in energy  
128 allocation due to acidification exposure (Sokolova et al., 2012). By examining oysters from the  
129 aforementioned Olympia oyster populations (Dabob Bay, Fidalgo Bay, and Oyster Bay) we  
130 leverage a comprehensive understanding of the traits characteristic of each population (Table 1)  
131 (Heare et al., 2017; Heare et al., 2018; Silliman et al., 2018; Spencer et al., 2020), and by using  
132 individuals that were bred and grown in common conditions we control for within-generation  
133 carryover effects (Hettinger et al., 2012, 2013). Given the possible influence of intergenerational  
134 exposures on an organism's physiology (Goncalves et al., 2016, 2017), we also extend the  
135 analysis to include a second generation (larval offspring) to examine the potential impacts of  
136 parental exposures and population-of-origin on basal functions (larval size, gene expression). By  
137 fully describing its molecular and physiological response to acidification across distinct  
138 populations we show that *O. lurida* is a good candidate for aquaculture investment &  
139 conservation.

140 **Table 1.** Traits that are characteristic of the focal *O. lurida* populations from the greater Puget Sound region,  
141 summarized from previous studies of the same populations: (1) Heare et al. 2017 (2) Heare et al. 2018 (3)  
142 Silliman et al. 2018 (4) Spencer et al. 2020 (5) Ryan Crim *pers. comm.* Additionally, genetic differentiation  
143 among populations was characterized by White et al. (2017).

| <b>Location of <i>O. lurida</i> population</b> | <b>Growth rate, size at maturity</b>                       | <b>Reproductive output, timing</b>                       | <b>Performance in field &amp; hatchery trials</b>                         | <b>Immediate transcriptional response to stress</b>                                       |
|------------------------------------------------|------------------------------------------------------------|----------------------------------------------------------|---------------------------------------------------------------------------|-------------------------------------------------------------------------------------------|
| Fidalgo Bay                                    | Fast growth, large at maturity <sup>1,3</sup>              | Low/Moderate fecundity <sup>1,3,4</sup>                  | Moderate survival <sup>1,4</sup>                                          | No response <sup>2</sup>                                                                  |
| Dabob Bay                                      | Slow growth, small at maturity <sup>1,3,4</sup>            | Moderate fecundity <sup>1,3,4</sup>                      | High survival in field, high larval survival in hatchery <sup>1,4,5</sup> | No response <sup>2</sup>                                                                  |
| Oyster Bay                                     | Moderate growth, medium/large at maturity <sup>1,3,4</sup> | Very high fecundity, early to reproduce <sup>1,3,4</sup> | Low/moderate survival in field <sup>1,4</sup>                             | Altered expression of targeted genes 1-hr following heat & mechanical stress <sup>2</sup> |

144

## 145 **Methods**

### 146 ***Adult oyster source and history***

147 Experimental oysters were bred in 2013 as described in Heare et al. (2017) in common  
148 conditions from three populations of wild broodstock, which were harvested from Dabob Bay in  
149 Hood Canal, Oyster Bay in South Puget Sound, and Fidalgo Bay in North Puget Sound. Oysters  
150 were then maintained in common conditions in a pearl net adjacent to the Kenneth K. Chew  
151 Center for Shellfish Research and Restoration in central Puget Sound for approximately 3.5  
152 years. Upon entering experimental conditions, shell height for each population was on average  
153  $29.8 \pm 4.6\text{mm}$ ,  $35.7 \pm 4.5\text{mm}$ , and  $35.7 \pm 4.4\text{mm}$  for Dabob Bay, Oyster Bay, and Fidalgo Bay,  
154 respectively. Experimental oysters were therefore mature adults that had been produced and  
155 reared in common conditions, but had distinct genetic heritage.

156



157 ***Adult treatments and larval collection***

158 Beginning February 16, 2017 adults were exposed to two pCO<sub>2</sub> treatments for 52 days (control  
159 pCO<sub>2</sub>: 841 ± 85 µatm, pH 7.82 ± 0.02; high pCO<sub>2</sub>: 3,045 ± 488 µatm, pH 7.31 ± 0.02), as  
160 described in Spencer et al. (2020) and Venkataraman et al. (2019) (Supplemental Materials).  
161 Following experimental exposures, adults from all populations and pCO<sub>2</sub> treatments were  
162 returned to common conditions, reproductively conditioned, and spawned to produce offspring.  
163 Because *O. lurida* are viviparous spermcasters and brood larvae to the veliger stage, larvae were  
164 captured upon maternal liberation, which commenced on May 14th and persisted for 57 days.  
165 Details of the experimental and spawning conditions are described in (Spencer et al., 2020).  
166 Prior to the pCO<sub>2</sub> treatments adults were also exposed to two temperature regimes for 60 days.  
167 These represent what would be considered normal or ambient temperature (6.1 ± 0.2°C) and a  
168 temperature that would be considered elevated at the experimental site (10.2 ± 0.5°C) (see  
169 Spencer et al. 2020). Given that temperature did not interact with pCO<sub>2</sub> to affect the focal  
170 characteristics in adults or larvae, only effects of parental pCO<sub>2</sub> exposure were further examined  
171 for this study.

172 ***Tissue sampling***

173 Adult ctenidia tissue was collected immediately upon terminating pCO<sub>2</sub> treatments from Dabob  
174 Bay, Fidalgo Bay, and Oyster Bay. Nine oysters from each population and pCO<sub>2</sub> treatment were  
175 sacrificed and ctenidia tissue was collected and flash-frozen at approximately -116°C using a  
176 solution of ethanol and dry-ice then preserved at -80°C. Gonad tissue was collected from the  
177 same individuals, preserved in histology cassettes using the PAXgene Tissue FIX System  
178 (PreAnalytiX, Hombrechtikon, Switzerland), then processed for reproductive development  
179 analysis by Diagnostic Pathology Medical Group (Sacramento, California, USA).

180 Larval offspring were sampled at the veliger stage upon maternal liberation. For each group of  
181 larvae that was released, a portion were reared as described in Spencer et al. (2020) and the  
182 remaining were preserved by rinsing with fresh water into microcentrifuge tubes, removing  
183 water, then placing directly into -80°C freezer. Given the variable reproductive rates, the number  
184 of larval groups preserved for downstream analysis from control pCO<sub>2</sub> and high pCO<sub>2</sub> varied,  
185 and was 7 and 10 for Fidalgo Bay, 5 and 7 for Dabob Bay, and 17 and 13 for Oyster Bay,  
186 respectively. Each larval sample contained thousands of larvae (on average 170k), and consisted  
187 of siblings that were released from the same female on the same day. However, given that adults  
188 were continuously spawning and releasing larvae, it is possible that some larval samples  
189 contained a mix of multiple families from the same population and treatment.

#### 190 *Adult growth and reproductive development*

191 Adult oysters were measured for shell height before and after pCO<sub>2</sub> treatments (n=9 per  
192 population x pCO<sub>2</sub> treatment) using digital calipers (mm), defined as the maximum distance from  
193 the umbo along the dorsal/ventral axis. Shell height after pCO<sub>2</sub> treatments were compared among  
194 population and pCO<sub>2</sub> treatments using 2-way ANOVA. Since we were most interested in  
195 assessing effects of high pCO<sub>2</sub> exposure on growth rate for each population, population-specific  
196 differences in size between high-, control- and pre-pCO<sub>2</sub> treatments were tested using 1-way  
197 ANOVA, and Tukey honest significant difference tests were performed to assess pairwise  
198 comparisons.

199 Gonad samples (n=9 per population x pCO<sub>2</sub> treatment) collected before and after pCO<sub>2</sub>  
200 treatments were assigned sex and stage as described in Spencer et al, (2020). For each  
201 population, contingency tables were constructed for gonad sex, developmental stage of sperm,  
202 and developmental stage of eggs, and differences between pCO<sub>2</sub> treatments were compared using

203 Chi-Square or Fisher Exact Tests (depending on the number of males or females present within a  
204 population) and P-values were estimated using Monte-Carlo simulations with 1,000  
205 permutations.

### 206 *Larval offspring size*

207 Newly liberated veliger larvae were measured using a Nikon eclipse Ni microscope and the NIS-  
208 Elements BR imaging and measuring software (version 4.60). Mean shell height (distance from  
209 hinge to margin, perpendicular to hinge), and mean shell width (longest distance parallel to  
210 hinge) were estimated from at minimum 48 larvae per collection from each tank. Mean shell  
211 height and width were compared among population and parental treatments using 2-Way  
212 ANOVA and Type II Sums of Squares with the car package (Fox & Weisberg, 2018). Then,  
213 since we were most interested in assessing population-specific responses, effects of parental  
214 pCO<sub>2</sub> on larval size were assessed for each population using 1-Way ANOVA with Type II Sums  
215 of Squares.

### 216 *Library construction and sequencing*

217 RNA was isolated from 52 frozen adult ctenidia samples (n=8 or 9 per population x pCO<sub>2</sub>  
218 treatment) and 61 pooled whole-body larvae (5-13 per population x parental pCO<sub>2</sub> treatment)  
219 (Table 2). Each sample was homogenized in liquid nitrogen with a stone mortar and pestle and  
220 isolated following the RNazol® RT protocol for Total RNA Isolation (Molecular Research  
221 Center, Inc., Cincinnati, OH). RNA pellets were resuspended in DEPC-treated water, residual  
222 DNA contamination was removed using the Turbo DNase kit (Life Technologies, Carlsbad, CA),  
223 then RNA was quantified using the Qubit RNA assay with Qubit 3.0 Fluorometer (2.0ul of each  
224 sample for quantification, Life Technologies, Carlsbad, CA), and quality was assessed for a

225 subset of RNA isolates using the Bioanalyzer RNA 6000 Pico Chip assay (Agilent Technologies,  
226 Santa Clara, CA).

227       Library preparation was performed following the QuantSeq 3' mRNA-Seq protocol  
228 (v.015UG009V0251, Lexogen, Vienna, Austria), also known as TagSeq, which generates cDNA  
229 from the 3' end of mRNA strands and only generates one fragment per mRNA transcript,  
230 allowing for accurate gene expression data at a reduced cost (Meyer et al., 2011). Briefly, Total  
231 RNA (350 ng) was used to generate single-stranded DNA using reverse transcription (oligoT  
232 priming), which binds to the poly(A) tail and includes the read 1 adapter; RNA was removed,  
233 then the second DNA strand + Illumina adapter was synthesized by random priming; the double  
234 stranded cDNA + adapters were purified using magnetic beads, then an aliquot (1uL) of each  
235 library was amplified using qPCR to determine the optimal number of cycles needed for  
236 Endpoint PCR, which ranged from 14 to 17; the libraries were then amplified and indexed with  
237 unique barcodes, then re-purified. Prior to sequencing, all libraries were quantified using Qubit  
238 High Sensitivity DNA kits (Life Technologies, Carlsbad, CA), and the quality (e.g. fragment  
239 length) was assessed for a subset using a Bioanalyzer High Sensitivity DNA chip kit (Agilent  
240 Technologies, Santa Clara, CA). Single-end sequencing with 100-bp read length was conducted  
241 on a NovaSeq platform (Illumina, San Diego, CA) by the University of Washington's Northwest  
242 Genomics Center, who also demultiplexed the raw sequencing data.

243

244 **Table 2.** The number of QuantSeq libraries examined per population and parental pCO<sub>2</sub> treatment for adult and  
245 larval tissues.

|             | Adult ctenidia<br><i>individuals</i> |                       | Larval whole-body<br><i>pooled by maternal liberation group</i> |                       |
|-------------|--------------------------------------|-----------------------|-----------------------------------------------------------------|-----------------------|
|             | Control pCO <sub>2</sub>             | High pCO <sub>2</sub> | Control pCO <sub>2</sub>                                        | High pCO <sub>2</sub> |
| Fidalgo Bay | 9                                    | 8                     | 5                                                               | 10                    |
| Dabob Bay   | 9                                    | 8                     | 5                                                               | 5                     |
| Oyster Bay  | 9                                    | 9                     | 13                                                              | 11                    |

### 246 ***Expression data processing & analysis***

247 Raw reads were inspected for quality using FastQC (Andrews 2010) and MultiQC (Ewels et al.,  
248 2016), trimmed to remove Illumina adapters, poly(A)- and poly(G)-tails, and quality filtered (  
249  $\geq 20$  read length,  $> 15$  quality score) using the Cutadapt toolkit v2.10 (Martin, 2011), then aligned  
250 to the draft *O. lurida* genome v081 (GenBank accession GCA\_903981925.1) using Bowtie2  
251 v2.4.1 (Langmead & Salzberg, 2012) and local alignment with the pre-set --sensitive-local  
252 option. Average alignment rate was  $75.7 \pm 4.4\%$  for adult libraries and  $70.7 \pm 8.2\%$  for larval  
253 libraries. From the resulting alignment files (.bam), the number of reads that uniquely mapped to  
254 each *O. lurida* gene was determined using featureCounts v2.0.0 (Liao et al., 2014) and a gene  
255 annotation file that was adjusted to extend the 3' end by 2kb, as libraries were generated at the 3'  
256 end of the original mRNA transcripts.

257 Differential gene expression analysis was performed using DESeq2 (Love et al., 2014) in  
258 R v4.0.4 using RStudio interface v1.3.1093 (R Core Team, 2021; RStudio Team, 2020). Read  
259 counts were first filtered to remove genes with fewer than 10 total counts across all samples  
260 (1,229 and 7,725 genes were discarded for adult ctenidia and larval pools, respectively). For  
261 adults the number of reads retained for analysis ranged from 1.18M to 3.30M per sample and  
262 averaged  $1.99M \pm SD442K$ , and for larvae total reads ranged from 653K to 2.04M and averaged

263 1.32M  $\pm$ SD332K. The total number of genes and per-sample average retained for analysis was  
264 30,981 and 28,110 $\pm$ 607 for adult ctenidia, and 24,485 and 23,114  $\pm$ SD1,259 for larvae. Gene  
265 counts were assessed for differential gene expression for adult ctenidia between pCO<sub>2</sub> exposure  
266 within populations, and for larvae between parental pCO<sub>2</sub> exposures within and across  
267 populations. DESeq2 uses raw count data to generate generalized linear models and internally  
268 corrects for library size, therefore counts were not normalized prior to differential expression  
269 analysis.

270         Given the high performance of the Dabob Bay population in previous lab and field trials  
271 (Heare et al. 2017; Spencer et al. 2020; Ryan Crim *pers. comm.*), we examined genes that were  
272 constitutively expressed at unique levels in Dabob Bay. Pairwise differences in expression  
273 among Dabob Bay and the other two populations were identified in DESeq2 using  
274 transcriptomes from adults held in control conditions (n=9 libraries per population), and  
275 separately using transcriptomes from all larval samples (Table 2). For each life stage (adult and  
276 larvae), genes from the two pairwise comparisons (Dabob vs Fidalgo, Dabob vs. Oyster) were  
277 clustered into two gene sets: 1) genes that were more abundant, and 2) genes that were less  
278 abundant than the other two populations. Overlapping genes uniquely abundant in both adults  
279 and larvae from Dabob Bay were then interrogated for relative expression patterns (i.e. higher or  
280 lower than the other populations).

281         Differentially expressed genes were merged with the *O. lurida* genome to generate lists  
282 of Uniprot IDs from annotated genes. Enriched biological processes of differentially expressed  
283 genes sets were determined using the Gene-Enrichment and Functional Annotation Tool from  
284 DAVID v6.8, and were defined as those with modified Fisher Exact P-Values (EASE Scores)  
285 <0.1.

## 286 Results

### 287 *Effects of acidification on adult growth, sex ratio*

288 Adult oyster growth rate was reduced by acidification in the Oyster Bay population only: shell  
289 size did not differ after the high pCO<sub>2</sub> exposure, whereas those that were exposed to control  
290 pCO<sub>2</sub> were larger after treatment (Figure 2, Table 3). The Dabob Bay and Fidalgo Bay  
291 populations did not differ in size after either pCO<sub>2</sub> treatment compared to before (Figure 2, Table  
292 3). Shell height differed by population before ( $F(2,72)=3.44$ ,  $p=0.034$ ) and after ( $F(2,84)=16.5$ ,  
293  $p=9.28e^{-7}$ ) pCO<sub>2</sub> treatments, with the Dabob Bay population significantly smaller than both  
294 Fidalgo Bay and Oyster Bay, particularly after pCO<sub>2</sub> treatments.

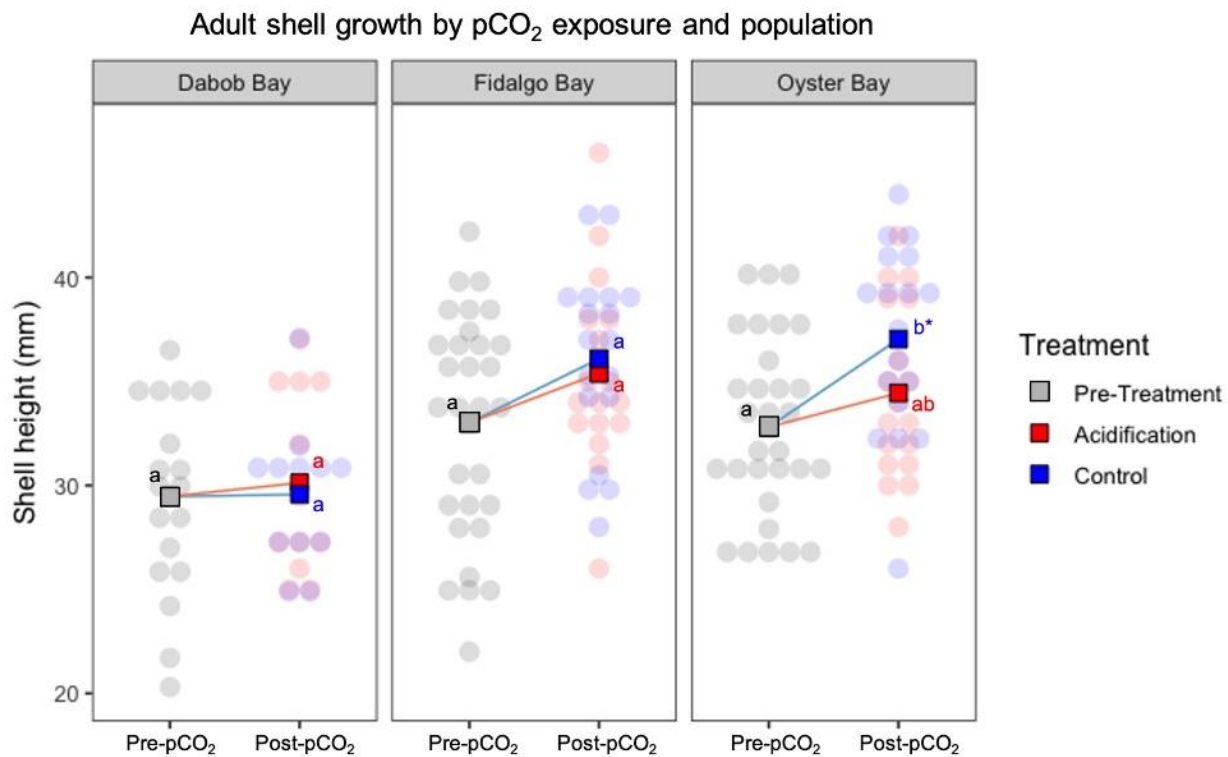

295  
296 **Figure 2.** Adult shell height before pCO<sub>2</sub> treatment (“Pre-pCO<sub>2</sub>”) and after 52 days in  
297 acidification (pCO<sub>2</sub> = 3045 ± 488 μatm; pH = 7.31 ± 0.02) and control conditions (pCO<sub>2</sub> = 841 ±  
298 85 μatm; pH = 7.82 ± 0.02) for each population. Transparent points each represent one adult

299 oyster color-coded by pCO<sub>2</sub> treatment, and overlaid square points indicate mean shell height.  
 300 Those exposed to control pCO<sub>2</sub> were larger than before the pCO<sub>2</sub> treatments in the Oyster Bay  
 301 population only.

302 **Table 3:** Shell size statistics for each population. 1-way ANOVA compared shell height of oysters before  
 303 treatment (Pre-Treatment) and after acidification and control treatments. Tukey multiple comparison of means  
 304 was used to test for significant growth of oysters during the 52-day exposure to control conditions and  
 305 acidification.

| Population  | ANOVA statistics               | Tukey comparison of means:<br><i>Control vs. Pre-treatment</i> | Tukey comparison of means:<br><i>Acidification vs. Pre-treatment</i> |
|-------------|--------------------------------|----------------------------------------------------------------|----------------------------------------------------------------------|
| Dabob Bay   | F(2,39)=0.09, p=0.91           | Δ=0.10, p-adj=1.0                                              | Δ=0.66, p-adj=0.91                                                   |
| Fidalgo Bay | F(2,63)=0.26, p=0.079          | Δ=3.08, p-adj=0.094                                            | Δ=2.38, p-adj=0.24                                                   |
| Oyster Bay  | <b>F(2,63)=5.35, p=0.0071*</b> | <b>Δ=4.22, p-adj=0.0049*</b>                                   | Δ=1.64, p-adj=0.42                                                   |

306  
 307 Progression from one sex to the other in these hermaphroditic oysters was affected by  
 308 acidification in the Oyster Bay population only: the ratio of predominantly-  
 309 females:predominantly-males differed significantly between pCO<sub>2</sub> treatments (p-sim=0.015),  
 310 with fewer females present after exposure to high pCO<sub>2</sub> (Figure 3). The developmental stages of  
 311 sperm and eggs (when present) did not differ between control and high pCO<sub>2</sub> treatment in any  
 312 population. Sperm development did not change during the 52-day exposure period in any  
 313 population. The Fidalgo Bay population exposed to control conditions contained more advanced-  
 314 and late-stage oocytes following the 52-day exposure compared to before (p-sim=1.0e-4), but  
 315 this was not the case for Fidalgo Bay oysters exposed to acidification, or for any other  
 316 population. Additionally, compared to before pCO<sub>2</sub> treatment, the sex ratio differed following  
 317 control pCO<sub>2</sub> exposure in Oyster Bay (p-sim= 8.0e<sup>-4</sup>) and Fidalgo Bay (p-sim=1.3e<sup>-3</sup>), but did not



318 differ following high pCO<sub>2</sub> exposure in any population, or between any comparison in the Dabob  
319 Bay population.

320 The developmental stages of sperm and eggs (when present) did not differ between  
321 control and high pCO<sub>2</sub> treatment in any population. Sperm development did not change during  
322 the 52-day exposure period in any population. The Fidalgo Bay population exposed to control  
323 conditions contained more advanced- and late-stage oocytes following the 52-day exposure  
324 compared to before ( $p\text{-sim}=1.0e^{-4}$ ), but this was not the case for Fidalgo Bay oysters exposed to  
325 acidification, or for any other population.

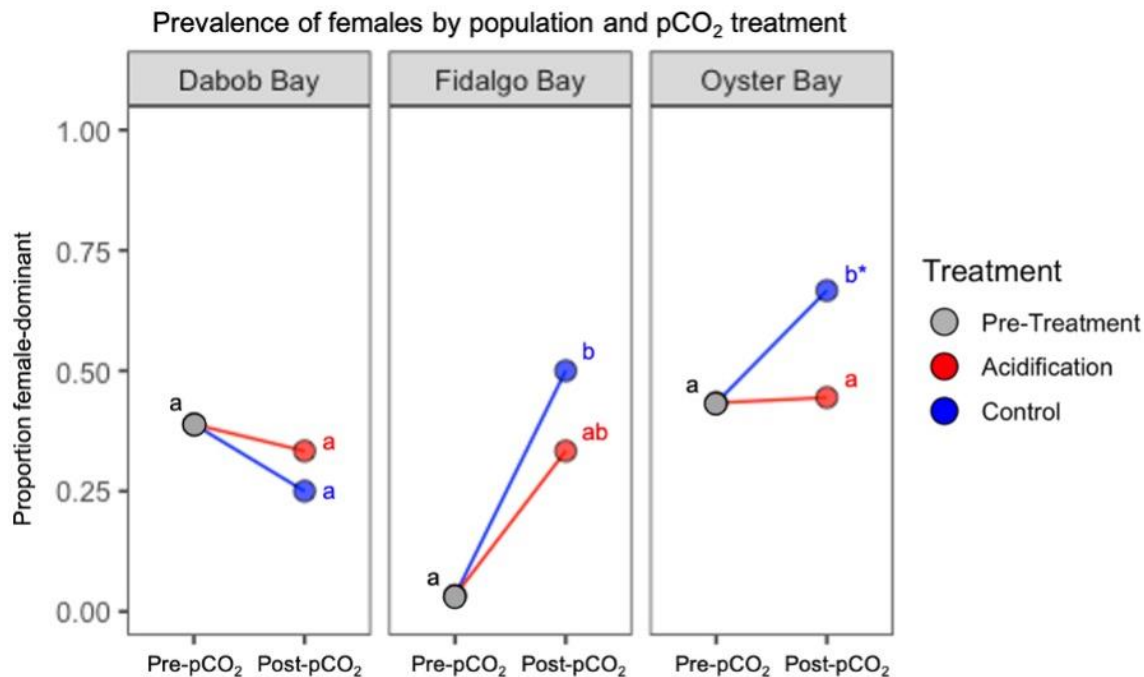

326 **Figure 3.** Proportion of oysters that were female or female-dominant before pCO<sub>2</sub> treatment  
327 (“Pre-pCO<sub>2</sub>”) and after 52 days in acidification (pCO<sub>2</sub> = 3045 ± 488 μatm; pH = 7.31 ± 0.02) and  
328 control conditions (pCO<sub>2</sub> = 841 ± 85 μatm; pH = 7.82 ± 0.02) for each population. The  
329 prevalence of females differed among pCO<sub>2</sub> treatments in the Oyster Bay population only.  
330

331 ***Differential expression in adults upon direct exposure to acidification***

332 Of 32,210 genes in the draft *O. lurida* genome, we detected expression in 30,981 genes in adult  
333 ctenidia tissue. Within populations, 132 and 76 genes were differentially expressed in Dabob  
334 Bay and Fidalgo Bay in response to pCO<sub>2</sub> treatments, respectively (Supplemental Materials). No  
335 expression differences were detected in the Oyster Bay population upon exposure to pCO<sub>2</sub>  
336 treatments. The annotated Dabob Bay and Fidalgo Bay DEGs were enriched for 25 and 6  
337 biological functions (Figure 4). Four genes were differentially expressed in both Dabob Bay and  
338 Fidalgo Bay, which code for Cytochrome P450 2B4 (CYP2B4, p-adj=0.021), Cytochrome P450  
339 2U1 (CYP2U1, p-adj=0.015), Fatty acid-binding protein (FABP4, p-adj=0.032), and Thyroxine  
340 5-deiodinase (DIO3, p-adj=0.028), all of which were more abundant in oysters exposed to high  
341 pCO<sub>2</sub>.

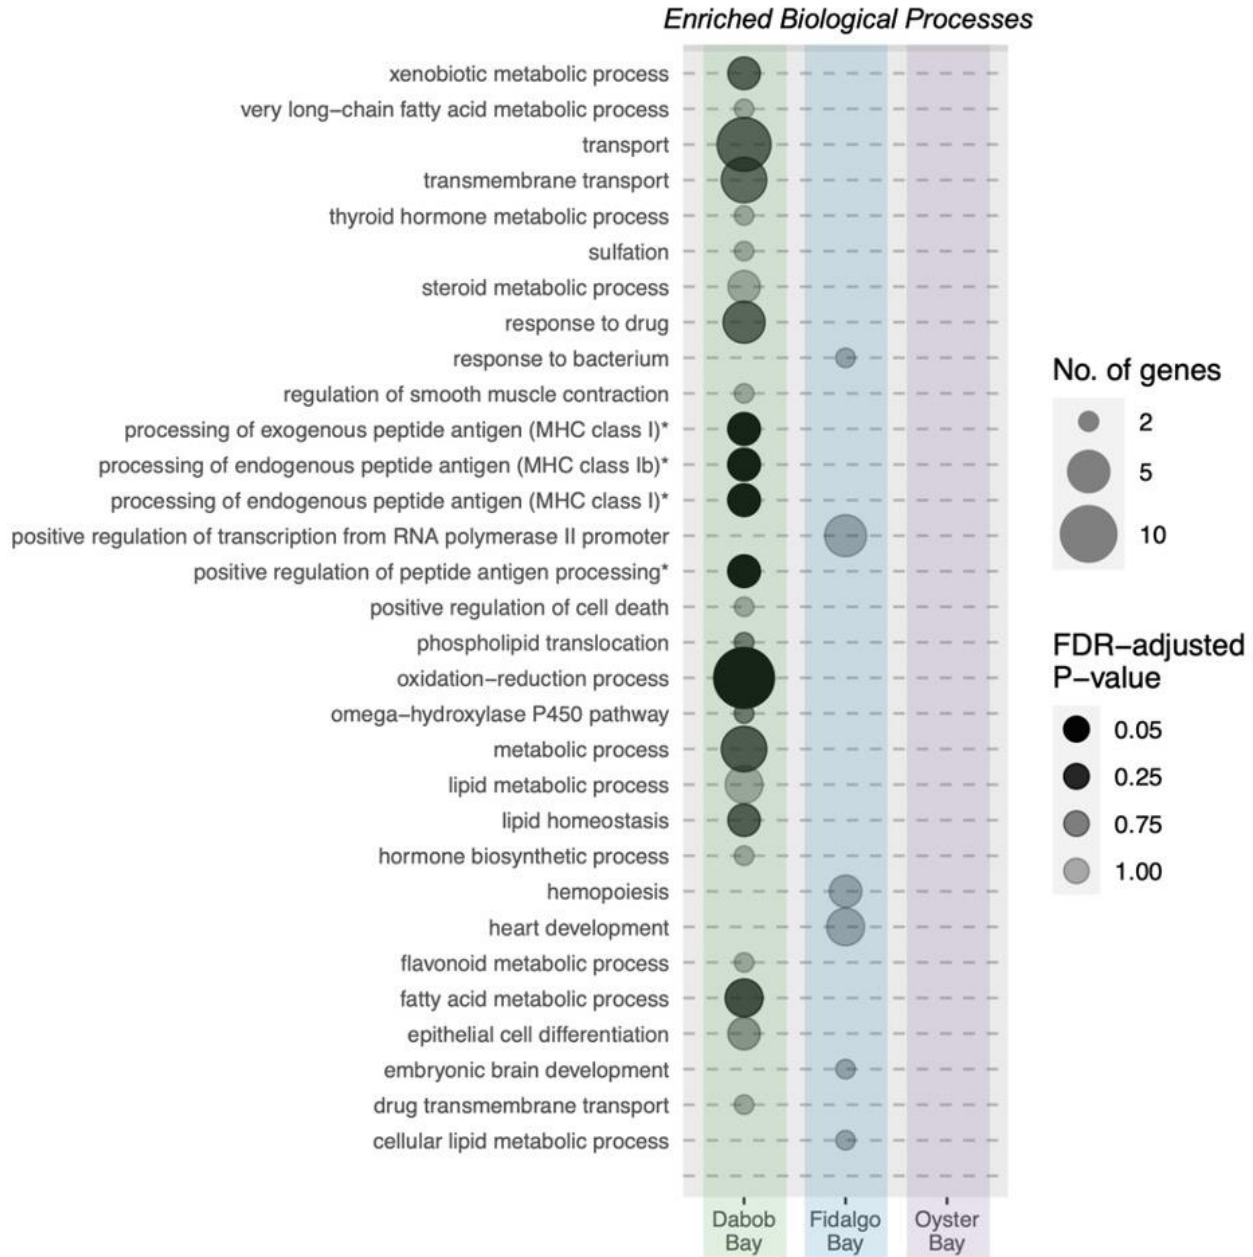

342

343 **Figure 4.** Enriched biological processes of differentially expressed genes upon exposure to high  
 344 pCO<sub>2</sub> in three populations with different bays-of-origin. No genes were differentially expressed  
 345 in the Oyster Bay population, and thus no processes were enriched. Asterisks indicate GO terms  
 346 that have been edited for length.

347 ***Impacts of parental exposures on larval offspring size***

348 Within populations, larval shell width and height differed by parental pCO<sub>2</sub> in the Oyster Bay  
349 population only (width: F(1,29)=5.46, p=0.027; height: F(1,29)=4.56, p=0.041), but did not  
350 differ significantly among parental pCO<sub>2</sub> in Fidalgo Bay (width: F(1,15)=0.0071, p=0.93; height:  
351 F(1,159)=0.14, p=0.71), or Dabob Bay (width: F(1,10)=0.71, p=0.49; height: F(1,10)=0.10,  
352 p=0.76) (Figure 5).

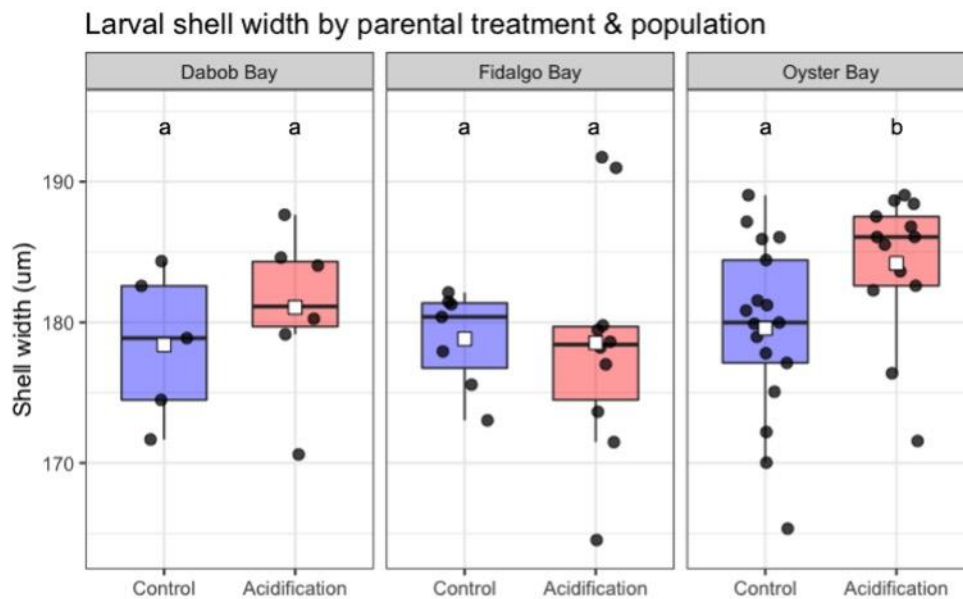

353  
354 **Figure 5.** Laval shell size upon maternal liberation was significantly affected by parental  
355 exposure to high pCO<sub>2</sub> in the Oyster Bay population only. Shell width is shown here. Each point  
356 represents the mean shell width of 40+ larvae from a release group. Treatments were terminated  
357 prior to adult reproductive conditioning and spawning, so larvae were never directly exposed to  
358 treatments.

359 ***Larval offspring gene expression***

360 Larvae were pooled by maternal release pulse and assessed for gene expression differences by  
361 parental exposure to acidification. We detected expression of 24,485 genes in larval samples.

362 Within populations, one gene was differentially expressed by parental pCO<sub>2</sub> in the Fidalgo Bay  
363 population, “OLUR\_00020618” (log<sub>2</sub> fold change = -1.6, p-adj = 0.011), which was not  
364 annotated. Across all populations no expression differences were detected between parental  
365 pCO<sub>2</sub> exposures.

### 366 *Constitutive expression differences in the high-performing Dabob Bay population*

367 Of the 30,981 genes examined in adults, 280 differed between Dabob Bay and Oyster Bay (0.9%  
368 of genes), and 379 differed between Dabob Bay and Fidalgo Bay (1.2% of genes), 89 of which  
369 were identified by both comparisons. Of these genes uniquely expressed in Dabob Bay, 220 were  
370 annotated (Supplemental Materials) and were enriched for 16 biological processes. There were  
371 31 genes that were both constitutively expressed at different levels in Dabob Bay compared to  
372 other populations and were differentially expressed in response to acidification. Of these  
373 overlapping genes, eleven were less abundant than the other populations constitutively, but in  
374 response to acidification they increased in abundance. Twenty were more abundant  
375 constitutively, but in response to acidification they became less abundant.

376       Of the 24,485 genes examined in larval offspring, 260 and 452 differed between Dabob  
377 Bay and Fidalgo Bay and Oyster Bay, respectively (0.86% and 0.88%), 59 of which were  
378 identified by both comparison and 25 of which were annotated (Supplemental Materials).  
379 Forty-two genes were differentially expressed in both adult and larval stages among Dabob Bay  
380 and the other populations, which largely followed the same constitutive expression patterns in  
381 both life stages: 26 genes were more abundant in Dabob Bay adults and larvae compared to the  
382 other populations, and 14 were less abundant in both stages.

383

## 384 **Discussion**

385 This study explored the within- and intergenerational response of *O. lurida* to acidification in  
386 three populations that had been reared in common conditions, but had distinct genetic ancestries.  
387 Each population demonstrated unique physiologies, which were evident in growth, gonad  
388 development, and transcriptional responses to pCO<sub>2</sub> treatments. In the Dabob Bay population  
389 there was no growth or change in sex ratio regardless of treatment. However, Dabob Bay oysters  
390 demonstrated a robust transcriptional response to high pCO<sub>2</sub> enriched for oxidation-  
391 reduction/detoxification, lipid metabolism, and other key processes. In stark contrast, no  
392 transcriptional response was detected in Oyster Bay oysters, but growth rate and prevalence of  
393 females were both negatively affected by acidification. There was a moderate transcriptional  
394 response in the Fidalgo Bay population, with no change in growth rate and minor effects to sex  
395 ratio as a result of acidification. This study also explored intergenerational carryover effects of  
396 adult exposure to acidification on basal gene expression and size of larvae upon maternal  
397 liberation across populations. Larvae were larger from adults exposed to high pCO<sub>2</sub> in the Oyster  
398 Bay population only. Counter to predictions we found no signature of parental exposure to  
399 acidification in larval transcriptomes. The unique responses to acidification support previous  
400 observations of varying stress-tolerance in the same populations.

### 401 ***Population-specific effects of acidification on growth and reproduction are associated with*** 402 ***performance***

403 Growth rate varies among Puget Sound *O. lurida* populations (Heare et al., 2017; Heare et al.,  
404 2018; Silliman et al., 2018; Spencer et al., 2020), and this study indicates that it also responds to  
405 acidification in a population-specific manner. Shell growth was stunted by acidification in the  
406 adults from Oyster Bay, as they grew in control conditions but did not in acidified conditions. In

407 contrast, adults from Dabob Bay and Fidalgo Bay did not grow during the 52-day experiment  
408 regardless of pCO<sub>2</sub> treatment. Previous studies characterized Dabob Bay as the slowest growing  
409 population, but also found that those oysters also performed best in hatchery and field trials.  
410 Heare et al. (2017) and Silliman et al. (2018) both observed slowest growth in the Dabob Bay  
411 population and fastest growth in the Fidalgo Bay population. Heare et al. (2017) also observed  
412 highest deployment survival in Dabob Bay progeny. In Spencer et al. 2020 the Dabob Bay  
413 population was slowest to reach the eyed larval stage (~18 days) (Fidalgo Bay was the fastest,  
414 ~14 days), and had the highest survival during the larval stage (the lowest survival was in Oyster  
415 Bay population). Together, these studies indicate that *O. lurida* from Dabob Bay may prioritize  
416 stress resilience and survival at the cost of growth rate and size at maturity.

417         Acidification affected reproductive processes in a population-specific manner. The  
418 natural male-female sexual progression was significantly altered by acidification in the Oyster  
419 Bay population only. Reproductive traits appear to be heritable in Puget Sound *O. lurida*, with  
420 notable differences in the Oyster Bay population. In a reciprocal transplant study, Heare et al.  
421 (2017) found that Oyster Bay had considerably higher incidents of brooding, and reached  
422 maximum percent brooding 20-30 days earlier than Dabob Bay and Fidalgo Bay populations  
423 (145-159 degree days). Silliman et al. (2018) and Spencer et al. (2020) also found the Oyster Bay  
424 population to be the most reproductively active, and in Spencer et al. (2020) Oyster Bay oysters  
425 began releasing larvae on average 9.9 days earlier than Fidalgo and Dabob Bays (99 degree days  
426 earlier). Here, we find that Oyster Bay was the only population for which pCO<sub>2</sub> exposure  
427 impacted reproductive processes, resulting in fewer females. A populations' reproductive  
428 capacity is limited by the number of oysters spawning as females, therefore the productivity of  
429 oysters from Oyster Bay may be uniquely impacted by acidification.

430           If we look beyond our focal populations, individuals that grow slowly and are not highly  
431 fecund may be more capable of withstanding high pCO<sub>2</sub> environments. Waldbusser *et al.*  
432 compared the response of *O. lurida* from Oregon with the faster growing Pacific oyster  
433 (*Crassostrea gigas*) to acidification, and suggested that slow shell secretion (a measure of growth  
434 rate) in *O. lurida* is a beneficial trait, contributing to their resilience to acidified conditions  
435 (Waldbusser *et al.*, 2016). The growth rate of acidification-tolerant abalone is considerably lower  
436 than those sensitive to acidification, resulting in juveniles that are up to 80% smaller at 3-months  
437 old (Swezey *et al.*, 2020). Whether growth rate is a proxy for resilience to acidification may not  
438 be applicable to all calcifiers, as faster growth is linked to ocean acidification resilience in  
439 selectively bred Sydney rock oysters (*Saccostrea glomerata*) (Parker *et al.*, 2011; Stapp *et al.*,  
440 2018; Thompson *et al.*, 2015). While no previous studies have associated reproductive  
441 investment with tolerance to acidification, a selectively bred line of Pacific oysters that are less  
442 sensitive to summer mortality and hypoxia also allocate less energy to reproductive tissue  
443 (Samain *et al.* 2007). Ultimately, the substantial and consistent resilience of the slow growing,  
444 moderately fecund Dabob Bay population in this study indicates that it is important to maintain a  
445 diversity of phenotypes, including those of lower fecundity and of smaller size. Oyster hatcheries  
446 routinely cull slow-growing larvae to maximize survival through metamorphosis, a practice that  
447 could be consistently removing stress-resilient genotypes. Highly fecund females and  
448 populations can also become overrepresented in cohorts of oyster seed. For long-term resilience  
449 to acidification and other stressors, commercial and restoration hatcheries should consider  
450 retaining slow-growing larvae and breed adults from a variety of sizes and productivity levels.  
451



452 ***Population-specific upregulation of some, but not all, detoxification genes in response to***  
453 ***acidification***

454 The transcriptional response of *O. lurida* acclimated to ocean acidification varied considerably  
455 by population, ranging from a robust response in Dabob Bay to no significant measurable  
456 response in Oyster Bay. The pronounced response of Dabob Bay to acidification could reflect  
457 that populations' higher tolerance to stressors, and its ability to maintain altered homeostasis  
458 during the prolonged (52-day) exposure to acidification. For instance, Dabob Bay adults exposed  
459 to acidification contained a pronounced increase in transcripts from genes involved in  
460 detoxification, including several Cytochrome P450 (CYP), cytosolic sulfotransferases (SULT),  
461 and Glutathione transferases (GST). CYPs and SULTs are detoxification enzymes which  
462 metabolize both endogenous products (e.g. fatty acids, hormones) and xenobiotics (Coughtrie  
463 2016; Snyder, 2000). Glutathiones are important cellular antioxidants which scavenge reactive  
464 metabolites, including hydrogen peroxide, and have been found at higher levels in many bivalves  
465 in response to acidification (Matozzo et al., 2013; Timmins-Schiffman et al., 2013), which may  
466 be related to their ability to protect proteins from oxidative stress (Abele et al., 2011;  
467 Sandamalika et al., 2019; Tomanek, 2015). Enhanced expression of GST and other intracellular  
468 stress mechanisms have similarly been observed in acidification-tolerant Sydney rock oysters  
469 upon intergenerational exposure to acidification (Goncalves et al., 2017), and direct exposure to  
470 thermal stress (McAfee et al., 2018). Two genes that codes for S-crystallins were also more  
471 prevalent in Dabob Bay oysters acclimated to high pCO<sub>2</sub>. S-crystallins are known to be structural  
472 components of cephalopod eyes, however they are apparently derived from GSTs (Tomarev &  
473 Piatigorsky, 1996) as they have very similar amino acid sequences, and while they are generally  
474 thought to lack enzymatic activity they are induced by heat shock (Lang et al., 2009). This could

475 indicate that the Dabob Bay population activates additional detoxicant pathways for a more  
476 robust response to environmental stressors.

477 Interestingly, none of the typical enzymatic antioxidants (catalase, superoxide dismutase,  
478 peroxiredoxin) were differentially expressed in response to acidification in any population,  
479 despite detection and sufficient coverage. Opposing expression patterns have previously been  
480 reported for GST and enzymatic antioxidants in a transgenerationally acclimated acidification-  
481 tolerant line of Sydney rock oysters (Goncalves et al., 2016), which the authors suggested  
482 reflects distinct detoxification systems and/or stimuli. The glutathione scavenging system is also  
483 uniquely upregulated in a heat-tolerant species of vent polychaete compared to a heat-sensitive  
484 congener (Dilly et al., 2012). GST and related proteins may therefore act as the main cellular  
485 antioxidants in populations of oysters and other invertebrates tolerant to acidified conditions and  
486 other abiotic stressors.

#### 487 ***Population-specific changes in metabolism and energy production***

488 Acidification altered expression of genes involved in lipid metabolism and transport in a  
489 population-specific pattern similar to the detoxification genes such that they ranged from highly  
490 upregulated in Dabob Bay to nearly unresponsive in Oyster Bay. These included genes that code  
491 for proteins in the peroxisome, which is an organelle that produces phospholipids, a major  
492 component of cell membranes, and metabolize long-chain fatty acids for energy production. The  
493 peroxisome proliferator-activated receptor gene, for instance, was much more active in the  
494 Dabob Bay population, which indicates the need for synthesis of peroxisome organelles. The co-  
495 activation of lipid metabolic and oxidation-reduction processes, most notably in Dabob Bay,  
496 could reflect enhanced mobilization of energy stores to support increased detoxicant synthesis  
497 (Goncalves et al., 2016; Hochachka & Somero, 2002; Mayor et al., 2015; Sokolova et al., 2012).

498 There are previous reports of acidification-induced increases in intracellular energy production,  
499 particularly in organisms tolerant to acidification and following long-term exposure (reviewed by  
500 Strader et al., 2020), and coinciding with activation of antioxidant defenses (Goncalves et al.,  
501 2016).

502 Several other genes involved in mitochondrial energy production were altered in  
503 acidification-acclimated Dabob Bay oysters, suggesting increased energy production. This  
504 included the *Acadl* gene which codes for the Long-chain specific acyl-CoA dehydrogenase, a  
505 mitochondrial protein involved in production of energy from fats (specifically, fatty-acid beta-  
506 oxidation), and the *si:dkey-1811.1* gene (von Willebrand factor) which is involved in  
507 mitochondrial ATPase activity, and the *alxA* gene, which codes for alternative oxidase and  
508 which may increase mitochondrial respiration when the cytochrome respiratory pathway is  
509 restricted. There were also population-specific changes to a clustered mitochondria protein  
510 homolog (AAEL000794) which is involved in the distribution of mitochondria in the cytoplasm.  
511 Basal levels were fewer in Dabob Bay than other populations (not significantly), but were then  
512 substantially higher in Dabob Bay in high pCO<sub>2</sub>. The same expression pattern was observed in  
513 *atad3-a* (ATPase family AAA domain-containing protein 3-A), a protein that is essential for  
514 mitochondrial organization. Taken together, the basal and induced expression patterns in Dabob  
515 Bay could reflect a unique shift in mitochondrial efficiency and density in response to high pCO<sub>2</sub>  
516 to produce sufficient energy to maintain cellular homeostasis in prolonged acidification  
517 exposure.

### 518 ***Constitutive expression differences in the Dabob Bay population***

519 We explored constitutive expression in Dabob Bay in an effort to understand why that population  
520 is unique in its transcriptional response to acidification, and how that might relate to its track

521 record of high survival and stress tolerance (Heare et al., 2017; Silliman et al., 2018; Spencer et  
522 al., 2020). Many of the annotated genes that were uniquely expressed in control Dabob Bay  
523 adults were involved in immune functions (e.g. the complement system) and were enriched for  
524 antimicrobial and antiviral processes (e.g. cellular response to interferon-gamma), indicating that  
525 the Dabob Bay population is uniquely equipped to combat pathogens. Metabolic, growth, and  
526 reproduction processes were also overrepresented in Dabob Bay adult expression, and many of  
527 the same gene families were also uniquely expressed in Dabob Bay larvae. These annotated gene  
528 sets unique to Dabob Bay adults and larvae (220 and 25, respectively, Supplemental Materials)  
529 provide insight into the mechanisms behind the population's unique energy distribution across  
530 life stages, and should be validated in other stress-tolerant, high-performing marine invertebrate  
531 populations.

532         Given its slow growth rate and relatively low/moderate fecundity, the Dabob Bay  
533 population was theorized to allocate more resources towards stress-response processes than other  
534 populations by constitutively expressing higher levels of genes that respond to acidified  
535 conditions. In this way, Dabob Bay would be uniquely “primed” for acidification by maintaining  
536 more transcripts of beneficial genes under typical conditions, which then become even more  
537 prevalent in acidification-acclimated oysters. Contrary to this prediction, those genes that were at  
538 higher levels in Dabob Bay constitutively become less abundant in response to acidification, and  
539 conversely those that were less abundant constitutively increased in acidification. The annotated  
540 genes that were depressed constitutively but were activated in response to acidification were  
541 largely involved in lipid transport and energy production, in addition to protein stabilization and  
542 cell migration. The annotated genes that were more active constitutively but then decreased in  
543 response to acidification were involved in immune function, cell cycle, and reproduction. Our

544 findings suggest that populations of marine invertebrates tolerant to long-term acidification  
545 exposure are capable not necessarily because they are more prepared at the transcript level, but  
546 rather because they can mount then sustain a shift in resources to maintain lipid metabolic  
547 function, while down-regulating functions that are not critical to the acidification response, such  
548 as reproduction, immune function, and cell cycle.

#### 549 ***Population-specific carryover effect of parental exposure to acidification***

550 Parental exposure to acidification resulted in larger larval offspring in the Oyster Bay population  
551 only. Oyster Bay larvae from parents exposed to acidification were on average 5 $\mu$ m (3%) larger  
552 than those from control parents. Larval size is positively associated with lipid content, growth  
553 rate, and feeding ability in many bivalves, and can reduce predation risk (Bailey, 1984; Gonzalez  
554 Araya et al., 2012; Helm et al., 1973; Marshall & Keough, 2007; Wilson et al., 1996). Increased  
555 larval size following intergenerational exposure to acidification and warming could therefore  
556 benefit some *O. lurida* populations in the wild, particularly those that also encounter  
557 environmental stressors (Gibbs et al., 2021). Our results align with previous studies showing that  
558 parental exposure to acidification can influence the physiology of invertebrate larval offspring.  
559 This was first detected in the Sydney rock oyster (Parker et al., 2012), as parental exposure to  
560 acidification resulted in higher larval survival and growth rates. Subsequently, some studies also  
561 reported positive intergenerational and transgenerational carryover effects (reviewed in Zhao et  
562 al., 2020), while others found negative effects (Parker et al., 2017; Venkataraman et al., 2019), or  
563 no signal of parental exposure (Clements et al., 2021). In the present study, carryover effects  
564 were only detected in one of three populations, indicating that parental priming may only be  
565 triggered by acidification in some genotypes or epigenotypes. Furthermore, populations unable

566 to acclimatize directly to acidification (i.e. Oyster Bay in this study) may instead invest in  
567 parental priming.

568         The variety of intergenerational responses observed here and in previous studies could  
569 also stem from the mechanisms by which offspring are affected, which are theorized as changes  
570 to maternal provisioning, gamete mRNAs, and epigenetic changes (Eirin-Lopez & Putnam,  
571 2019). If so, one would expect associated signals in larval transcriptomes, reflecting either  
572 energetic differences, remnant maternal mRNA transcripts, or regulatory shifts due to epigenetic  
573 changes (Gavery & Roberts, 2010, 2013). Curiously, despite size differences associated with  
574 parental treatments in the Oyster Bay population, there were no differences in gene expression.  
575 Differing sizes may therefore not be due to variable growth rate, as that would likely have been  
576 reflected in expression profiles (Meyer & Manahan, 2010; Pace et al., 2006). It is possible that  
577 cryptic intergenerational transcriptome plasticity could be induced by high pCO<sub>2</sub> or other  
578 environmental stressors, but that was not revealed under ambient conditions in which larvae were  
579 reared. It remains unclear why intergenerational acidification exposure increases larval size in  
580 some populations and species.

581 ***Puget Sound *O. lurida* populations have unique physiotypes which may be adaptive***

582 To date, this and five other studies have characterized Puget Sound *O. lurida* with Fidalgo Bay,  
583 Dabob Bay, and Oyster Bay heritage (Heare et al., 2017; Heare et al., 2018; Silliman et al., 2018;  
584 Spencer et al., 2020; White et al. 2017). The three populations are close proximally (all are  
585 within the greater Puget Sound estuary), yet they represent distinct physiotypes in how they  
586 prioritize energy allocation constitutively, and when responding to an environmental stressor.  
587 Remarkably, in contrast to the other populations, high pCO<sub>2</sub> elicited no transcriptional response  
588 in Oyster Bay, which raises the question as to where energy typically allocated towards

589 reproduction and growth was utilized in Oyster Bay oysters. A previous study on the same  
590 populations provides insight into Oyster Bay population's response. Heare et al. (2018) measured  
591 expression of targeted genes involved in the immediate (1-hr) stress-response following acute  
592 heat and mechanical shock, and reported that Oyster Bay was the only population for which a  
593 transcriptional response was detected. The discrepancy between Heare et al. (2018) and the  
594 present study could reflect unique responses to short-term vs. long-term abiotic stress.  
595 Specifically, those populations that are not capable of homeostatic stress-response over long  
596 periods could display the most pronounced short-term, acute response (i.e. Oyster Bay). We  
597 therefore suggest that the Oyster Bay population's aerobic scope shifted nearer to or into the  
598 pessimus range compared to the other populations (Sokolova et al. 2012), and was not capable of  
599 maintaining its regulatory response for the full 52-day exposure to acidification. Time-series  
600 expression analysis would improve our understanding of populations' varying abilities to  
601 respond to and maintain cellular functions over the course of prolonged exposure to acidification.

602 As suggested by Heare et al. (2017) and Silliman et al. (2018), the bay of origins' distinct  
603 environments may explain varying phenotypes observed in Puget Sound *O. lurida*. Dabob Bay  
604 is located within the Hood Canal, which is a notoriously challenging environment for marine  
605 organisms. As a highly stratified, silled fjord with long residence times, it experiences slow turn-  
606 over, periods of hypoxia, and elevated temperature (Babson, Kawase, & MacCready, 2006;  
607 Banas et al., 2015; Khangaonkar et al., 2018; Newton et al., 2007). Thus, the slow-growing,  
608 transcriptionally responsive phenotype observed in Dabob Bay oysters may have arisen due to  
609 selection for genotypes that allocate a high proportion of energy to cellular maintenance and  
610 chronic stress response. Fidalgo Bay is located in the Puget Sound's North Basin, and is more  
611 heavily influenced by tidal exchange and coastal oceanographic conditions. Fidalgo Bay

612 characteristics (faster growth, larger mature size, low/moderate reproduction and transcriptional  
613 response) could reflect an ancestral population that has not experienced extreme selection events,  
614 and therefore represents a less specialized physiotype. Oyster Bay is located in Southern Puget  
615 Sound, which is a system of shallower finger-like basins that are highly productive, mixed, and  
616 experience large seasonal temperature swings (Moore et al., 2008). South Puget Sound is well  
617 suited for both wild and farmed shellfish, and may have preferentially selected for individuals  
618 that are highly fecund but lack the ability to acclimatize to acidification. Given that population-  
619 of-origin was also a dominant factor influencing gene expression in larvae, the genetic or  
620 epigenetic contributions to diverse physiologies should not be underestimated for populations of  
621 *O. lurida* and related species, even in small geographic scales.

622

## 623 **Conclusion**

624 This is the first study to assess the transcriptional response of an oyster from the genus *Ostrea* to  
625 ocean acidification. In doing so, we greatly expand our understanding of how different oyster  
626 species will respond to shifting ocean conditions. There is increasing evidence that *Ostrea* spp.  
627 may be more tolerant than other oysters to acidification (Cole et al., 2016; Gray et al., 2019;  
628 Spencer et al., 2020; Waldbusser et al., 2016). Exploring cellular strategies in stress-tested  
629 larvae, a highly vulnerable stage, is an important avenue for future research. Furthermore, a  
630 physiological response spectrum was observed in three *O. lurida* populations exposed to ocean  
631 acidification. Given previous observations of stress tolerance in oysters from Dabob Bay we  
632 suggest that the robust transcriptomic changes in acclimated oysters and slow growth rate  
633 represent the more acidification-tolerant physiotype. However, observations of positive



634 carryover in Oyster Bay indicates that intergenerational plasticity could improve the outlook for  
635 future generations of less tolerant phenotypes.

## 636 **Acknowledgements**

637 Our gratitude to the following people who assisted with this project's many daily tasks: Grace  
638 Crandall, Kaitlyn Mitchell, Olivia Smith, Megan Hintz, Rhonda Elliott, Lindsay Alma, Sam  
639 White, Hollie Putnam, Brent Vadopalas, Bayer and Jackson Roberts, my husband Ian and my  
640 mom Anne. This project would not be possible without the support and encouragement of the  
641 Puget Sound Restoration Fund, which housed the experiment and whose staff contributed expert  
642 knowledge of Olympia oyster reproduction and husbandry: Ryan Crim, Stuart Ryan, Alice  
643 Helker, Brian Allen, Betsy Peabody, Josh Bouma, and Joth Davis. Thank you to my committee  
644 members Rick Goetz, Jacqueline Padilla-Gamiño, Jennifer Ruesink, and Steven Roberts.  
645 This work was supported by the National Science Foundation Graduate Research Internship  
646 Program, the University of Washington College of the Environment Hall Conservation Research  
647 Award, and the National Shellfisheries Association Melbourne Carriker Award.

648

## 649 **References**

- 650 1. Abele, D., Vazquez-Medina, J. P., & Zenteno-Savin, T. (2011). *Oxidative Stress in Aquatic*  
651 *Ecosystems*. John Wiley & Sons.
- 652 2. Andrews, S. (2010). FastQC: A Quality Control Tool for High Throughput Sequence Data  
653 [Online]. Available online at: <http://www.bioinformatics.babraham.ac.uk/projects/fastqc/>
- 654 3. Bailey, K. M. (1984). Comparison of laboratory rates of predation of five species of marine  
655 fish larvae by three planktonic invertebrates: effects of larval size on vulnerability. *Marine*  
656 *Biology*, 79(3), 303–309.

- 657 4. Barber, B. J., Ford, S. E., & Wargo, R. N. (1991). Genetic Variation in the Timing of  
658 Gonadal Maturation and Spawning of the Eastern Oyster, *Crassostrea virginica* (Gmelin).  
659 *The Biological Bulletin*, 181(2), 216–221.
- 660 5. Bayne, B. L. (2017). *Biology of Oysters*. Academic Press.
- 661 6. Bitter, M. C., Kapsenberg, L., Gattuso, J.-P., & Pfister, C. A. (2019). Standing genetic  
662 variation fuels rapid adaptation to ocean acidification. *Nature Communications*, 10(1), 5821.
- 663 7. Branch, T. A., DeJoseph, B. M., Ray, L. J., & Wagner, C. A. (2013). Impacts of ocean  
664 acidification on marine seafood. *Trends in Ecology & Evolution*, 28(3), 178–186.
- 665 8. Chaparro, O. R., Montory, J. A., Segura, C. J., & Pechenik, J. A. (2009). Effect of reduced  
666 pH on shells of brooded veligers in the estuarine bivalve *Ostrea chilensis* Philippi 1845.  
667 *Journal of Experimental Marine Biology and Ecology*, 377(2), 107–112.
- 668 9. Clements, J. C., Carver, C. E., Mallet, M. A., Comeau, L. A., & Mallet, A. L. (2021). CO2-  
669 induced low pH in an eastern oyster (*Crassostrea virginica*) hatchery positively affects  
670 reproductive development and larval survival but negatively affects larval shape and size,  
671 with no intergenerational linkages. *ICES Journal of Marine Science: Journal Du Conseil*,  
672 78(1), 349–359.
- 673 10. Cole, V. J., Parker, L. M., O'Connor, S. J., O'Connor, W. A., Scanes, E., Byrne, M., & Ross,  
674 P. M. (2016). Effects of multiple climate change stressors: ocean acidification interacts with  
675 warming, hyposalinity, and low food supply on the larvae of the brooding flat oyster *Ostrea*  
676 *angasi*. *Marine Biology*, 163(5), 125.
- 677 11. Coughtrie, M. W. H. (2016). Function and organization of the human cytosolic  
678 sulfotransferase (SULT) family. *Chemico-Biological Interactions*, 259(Pt A), 2–7.

- 679 12. Crispo, E. (2008). Modifying effects of phenotypic plasticity on interactions among natural  
680 selection, adaptation and gene flow. *Journal of Evolutionary Biology*, 21(6), 1460–1469.
- 681 13. Dilly, G. F., Robert Young, C., Lane, W. S., Pangilinan, J., & Girguis, P. R. (2012).  
682 Exploring the limit of metazoan thermal tolerance via comparative proteomics: thermally  
683 induced changes in protein abundance by two hydrothermal vent polychaetes. In *Proceedings*  
684 *of the Royal Society B: Biological Sciences* (Vol. 279, Issue 1741, pp. 3347–3356).  
685 <https://doi.org/10.1098/rspb.2012.0098>
- 686 14. Eirin-Lopez, J. M., & Putnam, H. M. (2019). Marine Environmental Epigenetics. *Annual*  
687 *Review of Marine Science*, 11, 335–368.
- 688 15. Evans, T. G., Pespeni, M. H., Hofmann, G. E., Palumbi, S. R., & Sanford, E. (2017).  
689 Transcriptomic responses to seawater acidification among sea urchin populations inhabiting a  
690 natural pH mosaic. *Molecular Ecology*, 26(8), 2257–2275.
- 691 16. Ewels, P., Magnusson, M., Lundin, S., & Källér, M. (2016). MultiQC: summarize analysis  
692 results for multiple tools and samples in a single report. *Bioinformatics*, 32(19), 3047–3048.
- 693 17. Feely, R. A., Alin, S. R., Newton, J., Sabine, C. L., Warner, M., Devol, A., Krembs, C., &  
694 Maloy, C. (2010). The combined effects of ocean acidification, mixing, and respiration on  
695 pH and carbonate saturation in an urbanized estuary. *Estuarine, Coastal and Shelf Science*,  
696 88(4), 442–449.
- 697 18. Figuerola, B., Hancock, A. M., Bax, N., Cummings, V. J., Downey, R., Griffiths, H. J.,  
698 Smith, J., & Stark, J. S. (2021). A Review and Meta-Analysis of Potential Impacts of Ocean  
699 Acidification on Marine Calcifiers From the Southern Ocean. In *Frontiers in Marine Science*  
700 (Vol. 8). <https://doi.org/10.3389/fmars.2021.584445>
- 701 19. Fox, J., & Weisberg, S. (2018). *An R Companion to Applied Regression*. SAGE Publications.

- 702 20. Gavery, M. R., & Roberts, S. B. (2010). DNA methylation patterns provide insight into  
703 epigenetic regulation in the Pacific oyster (*Crassostrea gigas*). *BMC Genomics*, *11*, 483.
- 704 21. Gavery, M. R., & Roberts, S. B. (2013). Predominant intragenic methylation is associated  
705 with gene expression characteristics in a bivalve mollusc. *PeerJ*, *1*, e215.
- 706 22. Gazeau, F., Parker, L. M., Comeau, S., Gattuso, J.-P., O'Connor, W. A., Martin, S., Pörtner,  
707 H.-O., & Ross, P. M. (2013). Impacts of ocean acidification on marine shelled molluscs.  
708 *Marine Biology*, *160*(8), 2207–2245.
- 709 23. Gibbs, M. C., Parker, L. M., Scanes, E., Byrne, M., O'Connor, W. A., & Ross, P. M. (2021).  
710 Energetic lipid responses of larval oysters to ocean acidification. *Marine Pollution Bulletin*,  
711 *168*, 112441.
- 712 24. Goncalves, P., Anderson, K., Thompson, E. L., Melwani, A., Parker, L. M., Ross, P. M., &  
713 Raftos, D. A. (2016). Rapid transcriptional acclimation following transgenerational exposure  
714 of oysters to ocean acidification. *Molecular Ecology*, *25*(19), 4836–4849.
- 715 25. Goncalves, P., Jones, D. B., Thompson, E. L., Parker, L. M., Ross, P. M., & Raftos, D. A.  
716 (2017). Transcriptomic profiling of adaptive responses to ocean acidification. *Molecular*  
717 *Ecology*, *26*(21), 5974–5988.
- 718 26. Gonzalez Araya, R., Mingant, C., Petton, B., & Robert, R. (2012). Influence of diet  
719 assemblage on *Ostrea edulis* broodstock conditioning and subsequent larval development.  
720 *Aquaculture*, *364-365*, 272–280.
- 721 27. Gray, M. W., Chaparro, O., Huebert, K. B., O'Neill, S. P., Couture, T., Moreira, A., &  
722 Brady, D. C. (2019). Life History Traits Conferring Larval Resistance against Ocean  
723 Acidification: The Case of Brooding Oysters of the Genus *Ostrea*. *Journal of Shellfish*  
724 *Research*, *38*(3), 751.

- 725 28. Heare, J. E., Blake, B., Davis, J. P., Vadopalas, B., & Roberts, S. B. (2017). Evidence of  
726 *Ostrea lurida* Carpenter, 1864, population structure in Puget Sound, WA, USA. *Marine*  
727 *Ecology*, 38(5). <https://doi.org/10.1111/maec.12458>
- 728 29. Heare, J. E., White, S. J., Vadopalas, B., & Roberts, S. B. (2018). Differential response to  
729 stress in *Ostrea lurida* as measured by gene expression. *PeerJ*, 6, e4261.
- 730 30. He, L., He, T., Farrar, S., Ji, L., Liu, T., & Ma, X. (2017). Antioxidants Maintain Cellular  
731 Redox Homeostasis by Elimination of Reactive Oxygen Species. *Cellular Physiology and*  
732 *Biochemistry: International Journal of Experimental Cellular Physiology, Biochemistry, and*  
733 *Pharmacology*, 44(2), 532–553.
- 734 31. Helm, M. M., Holland, D. L., & Stephenson, R. R. (1973). The Effect of Supplementary  
735 Algal Feeding of a Hatchery Breeding Stock of *Ostrea Edulis* L. on Larval Vigour. *Journal*  
736 *of the Marine Biological Association of the United Kingdom. Marine Biological Association*  
737 *of the United Kingdom*, 53(3), 673–684.
- 738 32. He, Q., & Silliman, B. R. (2019). Climate Change, Human Impacts, and Coastal Ecosystems  
739 in the Anthropocene. *Current Biology: CB*, 29(19), R1021–R1035.
- 740 33. Hettinger, A., Sanford, E., Hill, T. M., Lenz, E. A., Russell, A. D., & Gaylord, B. (2013).  
741 Larval carry-over effects from ocean acidification persist in the natural environment. *Global*  
742 *Change Biology*, 19(11), 3317–3326.
- 743 34. Hettinger, A., Sanford, E., Hill, T. M., Russell, A. D., Sato, K. N. S., Hoey, J., Forsch, M.,  
744 Page, H. N., & Gaylord, B. (2012). Persistent carry-over effects of planktonic exposure to  
745 ocean acidification in the Olympia oyster. *Ecology*, 93(12), 2758–2768.
- 746 35. Hochachka, P. W., & Somero, G. N. (2002). *Biochemical Adaptation: Mechanism and*  
747 *Process in Physiological Evolution*. Oxford University Press.

- 748 36. IPCC, 2019: IPCC Special Report on the Ocean and Cryosphere in a Changing Climate [H.-  
749 O. Pörtner, D.C. Roberts, V. Masson-Delmotte, P. Zhai, M. Tignor, E. Poloczanska, K.  
750 Mintenbeck, A. Alegría, M. Nicolai, A. Okem, J. Petzold, B. Rama, N.M. Weyer (eds.)]. *In*  
751 *press*.
- 752 37. Kelly, M. W., Padilla-Gamiño, J. L., & Hofmann, G. E. (2013). Natural variation and the  
753 capacity to adapt to ocean acidification in the keystone sea urchin *Strongylocentrotus*  
754 *purpuratus*. *Global Change Biology*, *19*(8), 2536–2546.
- 755 38. Kenkel, C. D., & Matz, M. V. (2017). Gene expression plasticity as a mechanism of coral  
756 adaptation to a variable environment. In *Nature Ecology & Evolution* (Vol. 1, Issue 1).  
757 <https://doi.org/10.1038/s41559-016-0014>
- 758 39. Kroeker, K. J., Kordas, R. L., Crim, R., Hendriks, I. E., Ramajo, L., Singh, G. S., Duarte, C.  
759 M., & Gattuso, J.-P. (2013). Impacts of ocean acidification on marine organisms: quantifying  
760 sensitivities and interaction with warming. *Global Change Biology*, *19*(6), 1884–1896.
- 761 40. Langmead, B., & Salzberg, S. L. (2012). Fast gapped-read alignment with Bowtie 2. *Nature*  
762 *Methods*, *9*(4), 357–359.
- 763 41. Lang, R. P., Bayne, C. J., Camara, M. D., Cunningham, C., Jenny, M. J., & Langdon, C. J.  
764 (2009). Transcriptome profiling of selectively bred Pacific oyster *Crassostrea gigas* families  
765 that differ in tolerance of heat shock. *Marine Biotechnology*, *11*(5), 650–668.
- 766 42. Lemasson, A. J., Fletcher, S., Hall-Spencer, J. M., & Knights, A. M. (2017). Linking the  
767 biological impacts of ocean acidification on oysters to changes in ecosystem services: A  
768 review. *Journal of Experimental Marine Biology and Ecology*, *492*, 49–62.

- 769 43. Lemasson, A. J., Hall-Spencer, J. M., Fletcher, S., Provstgaard-Morys, S., & Knights, A. M.  
770 (2018). Indications of future performance of native and non-native adult oysters under  
771 acidification and warming. *Marine Environmental Research*, *142*, 178–189.
- 772 44. Lemasson, A. J., Hall-Spencer, J. M., Kuri, V., & Knights, A. M. (2019). Changes in the  
773 biochemical and nutrient composition of seafood due to ocean acidification and warming.  
774 *Marine Environmental Research*, *143*, 82–92.
- 775 45. Lemasson, A. J., & Knights, A. M. (2021). Differential responses in anti-predation traits of  
776 the native oyster *Ostrea edulis* and invasive *Magallana gigas* to ocean acidification and  
777 warming. *Marine Ecology Progress Series*, *665*, 87–102.
- 778 46. Liao, Y., Smyth, G. K., & Shi, W. (2014). featureCounts: an efficient general purpose  
779 program for assigning sequence reads to genomic features. *Bioinformatics*, *30*(7), 923–930.
- 780 47. Love, M. I., Huber, W., & Anders, S. (2014). Moderated estimation of fold change and  
781 dispersion for RNA-seq data with DESeq2. *Genome Biology*, *15*(12), 550.
- 782 48. Macdonald, B. A., & Thompson, R. J. (1988). Intraspecific Variation in Growth and  
783 Reproduction in Latitudinally Differentiated Populations of the Giant Scallop *Placopecten*  
784 *magellanicus* (Gmelin). *The Biological Bulletin*, *175*(3), 361–371.
- 785 49. Marshall, D. J., & Keough, M. J. (2007). The Evolutionary Ecology of Offspring Size in  
786 Marine Invertebrates. In *Advances in Marine Biology* (Vol. 53, pp. 1–60). Academic Press.
- 787 50. Martin, M. (2011). Cutadapt removes adapter sequences from high-throughput sequencing  
788 reads. *EMBnet.journal*, *17*(1), 10–12.
- 789 51. Matozzo, V., Chinellato, A., Munari, M., Bressan, M., & Marin, M. G. (2013). Can the  
790 combination of decreased pH and increased temperature values induce oxidative stress in the



- 791 clam *Chamelea gallina* and the mussel *Mytilus galloprovincialis*? *Marine Pollution Bulletin*,  
792 72(1), 34–40.
- 793 52. Maynard, A., Bible, J. M., Pespeni, M. H., Sanford, E., & Evans, T. G. (2018).  
794 Transcriptomic responses to extreme low salinity among locally adapted populations of  
795 *Olympia* oyster (*Ostrea lurida*). *Molecular Ecology*, 27(21), 4225–4240.
- 796 53. Mayor, D. J., Sommer, U., Cook, K. B., & Viant, M. R. (2015). The metabolic response of  
797 marine copepods to environmental warming and ocean acidification in the absence of food.  
798 *Scientific Reports*, 5, 13690.
- 799 54. McAfee, D., Cumbo, V. R., Bishop, M. J., & Raftos, D. A. (2018). Intraspecific differences  
800 in the transcriptional stress response of two populations of Sydney rock oyster increase with  
801 rising temperatures. *Marine Ecology Progress Series*, 589, 115–127.
- 802 55. McGraw, K. A. (2009). The *Olympia* Oyster, *Ostrea lurida* Carpenter 1864 Along the West  
803 Coast of North America. *Journal of Shellfish Research*, 28(1), 5–10.
- 804 56. Melzner, F., Gutowska, M. A., Langenbuch, M., Dupont, S., Lucassen, M., Thorndyke, M.  
805 C., Bleich, M., & Pörtner, H.-O. (2009). Physiological basis for high CO<sub>2</sub> tolerance in  
806 marine ectothermic animals: pre-adaptation through lifestyle and ontogeny? *Biogeosciences* ,  
807 6(10), 2313–2331.
- 808 57. Melzner, F., Mark, F. C., Seibel, B. A., & Tomanek, L. (2019). Ocean Acidification and  
809 Coastal Marine Invertebrates: Tracking CO<sub>2</sub> Effects from Seawater to the Cell. *Annual*  
810 *Review of Marine Science*. <https://doi.org/10.1146/annurev-marine-010419-010658>
- 811 58. Meyer, E., Aglyamova, G. V., & Matz, M. V. (2011). Profiling gene expression responses of  
812 coral larvae (*Acropora millepora*) to elevated temperature and settlement inducers using a  
813 novel RNA-Seq procedure. *Molecular Ecology*, 20(17), 3599–3616.

- 814 59. Meyer, E., & Manahan, D. T. (2010). Gene expression profiling of genetically determined  
815 growth variation in bivalve larvae (*Crassostrea gigas*). *The Journal of Experimental Biology*,  
816 *213*(5), 749–758.
- 817 60. Moore, S. K., Mantua, N. J., Newton, J. A., Kawase, M., Warner, M. J., & Kellogg, J. P.  
818 (2008). A descriptive analysis of temporal and spatial patterns of variability in Puget Sound  
819 oceanographic properties. *Estuarine, Coastal and Shelf Science*, *80*(4), 545–554.
- 820 61. Navarro, J. M., Villanueva, P., Rocha, N., Torres, R., Chaparro, O. R., Benítez, S., Andrade-  
821 Villagrán, P. V., & Alarcón, E. (2020). Plastic response of the oyster *Ostrea chilensis* to  
822 temperature and pCO<sub>2</sub> within the present natural range of variability. *PloS One*, *15*(6),  
823 e0234994.
- 824 62. Pace, D. A., Marsh, A. G., Leong, P. K., Green, A. J., Hedgecock, D., & Manahan, D. T.  
825 (2006). Physiological bases of genetically determined variation in growth of marine  
826 invertebrate larvae: A study of growth heterosis in the bivalve *Crassostrea gigas*. *Journal of*  
827 *Experimental Marine Biology and Ecology*, *335*(2), 188–209.
- 828 63. Parker, L. M., O'Connor, W. A., Byrne, M., Coleman, R. A., Virtue, P., Dove, M., Gibbs,  
829 M., Spohr, L., Scanes, E., & Ross, P. M. (2017). Adult exposure to ocean acidification is  
830 maladaptive for larvae of the Sydney rock oyster *Saccostrea glomerata* in the presence of  
831 multiple stressors. *Biology Letters*, *13*(2). <https://doi.org/10.1098/rsbl.2016.0798>
- 832 64. Parker, L. M., Ross, P. M., & O'Connor, W. A. (2011). Populations of the Sydney rock  
833 oyster, *Saccostrea glomerata*, vary in response to ocean acidification. *Marine Biology*,  
834 *158*(3), 689–697.

- 835 65. Parker, L. M., Ross, P. M., O'Connor, W. A., Borysko, L., Raftos, D. A., & Pörtner, H.-O.  
836 (2012). Adult exposure influences offspring response to ocean acidification in oysters.  
837 *Global Change Biology*, *18*(1), 82–92.
- 838 66. Pereira, R. R. C., Scanes, E., Parker, L., Byrne, M., Cole, V. J., & Ross, P. M. (2019).  
839 Restoring the flat oyster *Ostrea angasi* in the face of a changing climate. *Marine Ecology*  
840 *Progress Series*, *625*, 27–39.
- 841 67. Prado, P., Roque, A., Pérez, J., Ibáñez, C., Alcaraz, C., Casals, F., & Caiola, N. (2016).  
842 Warming and acidification-mediated resilience to bacterial infection determine mortality of  
843 early *Ostrea edulis* life stages. *Marine Ecology Progress Series*, *545*, 189–202.
- 844 68. Przeslawski, R., Byrne, M., & Mellin, C. (2015). A review and meta-analysis of the effects of  
845 multiple abiotic stressors on marine embryos and larvae. *Global Change Biology*, *21*(6),  
846 2122–2140.
- 847 69. R Core Team. (2021). *R: A language and environment for statistical computing*.  
848 <https://www.R-project.org/>
- 849 70. Reum, J. C. P., Alin, S. R., Feely, R. A., Newton, J., Warner, M., & McElhany, P. (2014).  
850 Seasonal carbonate chemistry covariation with temperature, oxygen, and salinity in a fjord  
851 estuary: implications for the design of ocean acidification experiments. *PloS One*, *9*(2),  
852 e89619.
- 853 71. Riebesell, U., & Gattuso, J.-P. (2014). Lessons learned from ocean acidification research.  
854 *Nature Climate Change*, *5*(1), 12–14.
- 855 72. RStudio Team. (2020). *RStudio: Integrated Development for R*. <http://www.rstudio.com/>

- 856 73. Salinas, S., Brown, S. C., Mangel, M., & Munch, S. B. (2013). Non-genetic inheritance and  
857 changing environments. *Non-Genetic Inheritance, 1*.  
858 <http://access.portico.org/Portico/show?viewFile=pdf&auId=phx6831s7f0>
- 859 74. Sandamalika, W. M. G., Gayashani Sandamalika, W. M., Priyathilaka, T. T., Lee, S., Yang,  
860 H., & Lee, J. (2019). Immune and xenobiotic responses of glutathione S-Transferase theta  
861 (GST- $\theta$ ) from marine invertebrate disk abalone (*Haliotis discus discus*): With molecular  
862 characterization and functional analysis. In *Fish & Shellfish Immunology* (Vol. 91, pp. 159–  
863 171). <https://doi.org/10.1016/j.fsi.2019.04.004>
- 864 75. Samain, J. F., Dégremont, L., Soletchnik, P., Haure, J., Bédier, E., Ropert, M., Moal, J.,  
865 Huvet, A., Bacca, H., Van Wormhoudt, A., Delaporte, M., Costil, K., Pouvreau, S., Lambert,  
866 C., Boulo, V., Soudant, P., Nicolas, J. L., Le Roux, F., Renault, T., ... Boudry, P. (2007).  
867 Genetically based resistance to summer mortality in the Pacific oyster (*Crassostrea gigas*)  
868 and its relationship with physiological, immunological characteristics and infection  
869 processes. *Aquaculture* , 268(1), 227–243.
- 870 76. Sanford, E., Gaylord, B., Hettinger, A., Lenz, E. A., Meyer, K., & Hill, T. M. (2014). Ocean  
871 acidification increases the vulnerability of native oysters to predation by invasive snails.  
872 *Proceedings. Biological Sciences / The Royal Society*, 281(1778), 20132681.
- 873 77. Silliman, K. E., Bowyer, T. K., & Roberts, S. B. (2018). Consistent differences in fitness  
874 traits across multiple generations of Olympia oysters. *Scientific Reports*, 8(1), 6080.
- 875 78. Snyder, M. J. (2000). Cytochrome P450 enzymes in aquatic invertebrates: recent advances  
876 and future directions. *Aquatic Toxicology* , 48(4), 529–547.

- 877 79. Sokolova, I. M., Frederich, M., Bagwe, R., Lannig, G., & Sukhotin, A. A. (2012). Energy  
878 homeostasis as an integrative tool for assessing limits of environmental stress tolerance in  
879 aquatic invertebrates. *Marine Environmental Research*, 79, 1–15.
- 880 80. Spencer, L. H., Venkataraman, Y. R., Crim, R., Ryan, S., Horwith, M. J., & Roberts, S. B.  
881 (2020). Carryover effects of temperature and pCO<sub>2</sub> across multiple Olympia oyster  
882 populations. *Ecological Applications: A Publication of the Ecological Society of America*,  
883 30(3), e02060.
- 884 81. Stapp, L. S., Parker, L. M., O'Connor, W. A., Bock, C., Ross, P. M., Pörtner, H. O., &  
885 Lannig, G. (2018). Sensitivity to ocean acidification differs between populations of the  
886 Sydney rock oyster: Role of filtration and ion-regulatory capacities. *Marine Environmental*  
887 *Research*, 135, 103–113.
- 888 82. Strader, M. E., Wong, J. M., & Hofmann, G. E. (2020). Ocean acidification promotes broad  
889 transcriptomic responses in marine metazoans: a literature survey. *Frontiers in Zoology*, 17,  
890 7.
- 891 83. Sunday, J. M., Calosi, P., Dupont, S., Munday, P. L., Stillman, J. H., & Reusch, T. B. H.  
892 (2014). Evolution in an acidifying ocean. *Trends in Ecology & Evolution*, 29(2), 117–125.
- 893 84. Swezey, D. S., Boles, S. E., Aquilino, K. M., Stott, H. K., Bush, D., Whitehead, A., Rogers-  
894 Bennett, L., Hill, T. M., & Sanford, E. (2020). Evolved differences in energy metabolism and  
895 growth dictate the impacts of ocean acidification on abalone aquaculture. *Proceedings of the*  
896 *National Academy of Sciences of the United States of America*, 117(42), 26513–26519.
- 897 85. Thompson, E. L., O'Connor, W., Parker, L., Ross, P., & Raftos, D. A. (2015). Differential  
898 proteomic responses of selectively bred and wild-type Sydney rock oyster populations  
899 exposed to elevated CO<sub>2</sub>. *Molecular Ecology*, 24(6), 1248–1262.

- 900 86. Timmins-Schiffman, E., Nunn, B. L., Goodlett, D. R., & Roberts, S. B. (2013). Shotgun  
901 proteomics as a viable approach for biological discovery in the Pacific oyster. *Conservation*  
902 *Physiology*, *1*(1), cot009.
- 903 87. Tomanek, L. (2015). Proteomic responses to environmentally induced oxidative stress. *The*  
904 *Journal of Experimental Biology*, *218*(Pt 12), 1867–1879.
- 905 88. Tomarev, S. I., & Piatigorsky, J. (1996). Lens crystallins of invertebrates--diversity and  
906 recruitment from detoxification enzymes and novel proteins. *European Journal of*  
907 *Biochemistry / FEBS*, *235*(3), 449–465.
- 908 89. Vargas, C. A., Lagos, N. A., Lardies, M. A., Duarte, C., Manríquez, P. H., Aguilera, V. M.,  
909 Broitman, B., Widdicombe, S., & Dupont, S. (2017). Species-specific responses to ocean  
910 acidification should account for local adaptation and adaptive plasticity. *Nature Ecology &*  
911 *Evolution*, *1*(4), 84.
- 912 90. Venkataraman, Y. R., Spencer, L. H., & Roberts, S. B. (2019). Adult low pH exposure  
913 influences larval abundance in Pacific oysters (*Crassostrea gigas*). *Journal of Shellfish*  
914 *Research*. <https://par.nsf.gov/biblio/10082500>
- 915 91. Waldbusser, G. G., Gray, M. W., Hales, B., Langdon, C. J., Haley, B. A., Gimenez, I., Smith,  
916 S. R., Brunner, E. L., & Hutchinson, G. (2016). Slow shell building, a possible trait for  
917 resistance to the effects of acute ocean acidification. *Limnology and Oceanography*, *61*(6),  
918 1969–1983.
- 919 92. White, S. J., Vadopalas, B., Silliman, K., & Roberts, S. B. (2017). Genotype-by-sequencing  
920 of three geographically distinct populations of Olympia oysters, *Ostrea lurida*. *Scientific*  
921 *Data*, *4*, 170130.

- 922 93. Wilson, J. A., Chaparro, O. R., & Thompson, R. J. (1996). The importance of broodstock  
923 nutrition on the viability of larvae and spat in the Chilean oyster *Ostrea chilensis*.  
924 *Aquaculture* , 139(1), 63–75.
- 925 94. Zhao, L., Shirai, K., Tanaka, K., Milano, S., Higuchi, T., Murakami-Sugihara, N., Walliser,  
926 E. O., Yang, F., Deng, Y., & Schöne, B. R. (2020). A review of transgenerational effects of  
927 ocean acidification on marine bivalves and their implications for sclerochronology.  
928 *Estuarine, Coastal and Shelf Science*, 235, 106620.
- 929

930 Supplemental Materials

**Supplemental Table 1:** Carbonate chemistry parameters for three time points during the pCO<sub>2</sub> treatments, which are averages ( $\pm$  SE) from three replicate tanks per treatment. All parameters except for total alkalinity differed significantly between control/ambient (Amb.) and experimental/high (High.) tanks (One-way ANOVA). More details are available in Venkataraman *et al.*, 2019.

| Day       | pH***                           |                     | Total Alkalinity ( $\mu\text{mol/kg}$ ) |                        | pCO <sub>2</sub> ( $\mu\text{atm}$ )*** |                        | DIC ( $\mu\text{mol/kg}$ )*   |                        | $\Omega_{\text{calcite}}$ ***  |                       | $\Omega_{\text{aragonite}}$ *** |                        |
|-----------|---------------------------------|---------------------|-----------------------------------------|------------------------|-----------------------------------------|------------------------|-------------------------------|------------------------|--------------------------------|-----------------------|---------------------------------|------------------------|
|           | Amb.                            | High                | Amb.                                    | High                   | Amb.                                    | High                   | Amb.                          | High.                  | Amb.                           | High                  | Amb.                            | High                   |
|           | F(1,16) = 5838,<br>p = 6.12e-22 |                     | F(1,16) = 1.38,<br>p = 0.257            |                        | F(1,16) = 235,<br>p = 5.44e-11          |                        | F(1,16) = 7.12,<br>p = 0.0168 |                        | F(1,16) = 529,<br>p = 1.10e-13 |                       | F(1,16) = 527,<br>p = 1.14e-13  |                        |
| <b>5</b>  | 7.82 $\pm$<br>0.004             | 7.33 $\pm$<br>0.002 | 2307.41<br>$\pm$ 25.45                  | 2332.36<br>$\pm$ 31.05 | 747.51<br>$\pm$<br>13.94                | 2481.23<br>$\pm$ 29.83 | 2233.41<br>$\pm$ 25.29        | 2408.51<br>$\pm$ 31.76 | 1.86<br>$\pm$<br>0.02          | 0.62<br>$\pm$<br>0.01 | 1.16<br>$\pm$<br>0.012          | 0.58<br>$\pm$<br>0.007 |
| <b>33</b> | 7.81<br>$\pm$ 0.005             | 7.31<br>$\pm$ 0.004 | 2747.00<br>$\pm$ 21.13                  | 2917.60<br>$\pm$ 18.36 | 912.22<br>$\pm$<br>12.69                | 3309.52<br>$\pm$ 7.22  | 2664.57<br>$\pm$ 19.99        | 3020.99<br>$\pm$ 17.99 | 2.23<br>$\pm$<br>0.03          | 0.77<br>$\pm$<br>0.02 | 1.40<br>$\pm$<br>0.020          | 0.48<br>$\pm$<br>0.014 |
| <b>48</b> | 7.82 $\pm$<br>0.015             | 7.29 $\pm$<br>0.004 | 2611.40<br>$\pm$ 31.01                  | 2808.39<br>$\pm$ 12.24 | 863.47<br>$\pm$<br>42.42                | 3343.89<br>$\pm$ 49.49 | 2533.28<br>$\pm$ 35.45        | 2920.52<br>$\pm$ 15.11 | 2.13<br>$\pm$<br>0.06          | 0.68<br>$\pm$<br>0.01 | 1.32<br>$\pm$<br>0.035          | 0.42<br>$\pm$<br>0.004 |

931  
 932 Venkataraman, Y. R., Spencer, L. H., & Roberts, S. B. (2019). Adult low pH exposure  
 933 influences larval abundance in Pacific oysters (*Crassostrea gigas*). *Journal of Shellfish Research*.  
 934 <https://par.nsf.gov/biblio/10082500>  
 935



936 *Ostrea lurida* gene sets that were differentially expressed in response to ocean acidification in  
 937 some populations (Supplemental Table 2), and were uniquely expressed in the a stress-tolerant  
 938 population (Dabob Bay) at the adult stage (Supplemental Table 3) and veliger larval stage  
 939 (Supplemental Table 4).

940

941 **Supplemental Table 2.** Genes that were differentially expressed in response to ocean acidification in *Ostrea*  
 942 *lurida* populations, Dabob Bay and/or Fidalgo Bay. Positive Log<sub>2</sub>-FC values indicate abundances were higher  
 943 in oysters exposed to acidification.

| O. lurida Gene ID | Log <sub>2</sub> Fold Change | p-adj    | Uniprot SPID | Similar Annotated Gene                                             | Population with DEG |
|-------------------|------------------------------|----------|--------------|--------------------------------------------------------------------|---------------------|
| OLUR_00030878     | 0.87                         | 2.41E-02 | Q17N71       | AAEL000794: Clustered mitochondria protein homolog                 | Dabob Bay           |
| OLUR_00016317     | 0.78                         | 6.54E-03 | Q99758       | ABCA3: ATP-binding cassette sub-family A member 3                  | Dabob Bay           |
| OLUR_00013619     | 1.93                         | 6.82E-03 | P08183       | ABCB1: Multidrug resistance protein 1                              | Dabob Bay           |
| OLUR_00016960     | 1.59                         | 4.24E-02 | P06795       | Abcb1b: Multidrug resistance protein 1B                            | Dabob Bay           |
| OLUR_00011049     | 2.7                          | 1.48E-03 | P21440       | Abcb4: Phosphatidylcholine translocator ABCB4                      | Dabob Bay           |
| OLUR_00000769     | 1.05                         | 2.10E-02 | Q93YS4       | ABCG22: ABC transporter G family member 22                         | Fidalgo Bay         |
| OLUR_00022318     | 0.73                         | 5.56E-03 | P51174       | Acadl: Long-chain specific acyl-CoA dehydrogenase%2C mitochondrial | Dabob Bay           |
| OLUR_00024728     | 2.03                         | 2.89E-02 | Q9R0H0       | Acox1: Peroxisomal acyl-coenzyme A oxidase 1                       | Dabob Bay           |
| OLUR_00012845     | 2.27                         | 4.20E-02 | Q5R4M8       | ALDH18A1: Delta-1-pyrroline-5-carboxylate synthase                 | Fidalgo Bay         |
| OLUR_00011263     | 1.85                         | 9.64E-04 | Q9P959       | alxA: Alternative oxidase, C mitochondrial                         | Dabob Bay           |
| OLUR_00000533     | -0.9                         | 3.40E-03 | Q8N264       | ARHGAP24: Rho GTPase-activating protein 24                         | Fidalgo Bay         |
| OLUR_00022323     | 1.44                         | 4.15E-02 | Q58E76       | atad3-a: ATPase family AAA domain-containing protein 3-A           | Dabob Bay           |
| OLUR_00004651     | 0.47                         | 4.31E-02 | Q99933       | BAG1: BAG family molecular chaperone regulator 1                   | Dabob Bay           |
| OLUR_00001152     | -1.3                         | 2.80E-02 | A8Y1P7       | bre-4: Beta-1%2C4-N-acetylgalactosaminyltransferase bre-4          | Fidalgo Bay         |
| OLUR_00029448     | -0.8                         | 3.31E-02 | Q24157       | brn: Beta-1%2C3-galactosyltransferase brn                          | Dabob Bay           |
| OLUR_00021130     | -2.94                        | 8.88E-03 | Q8CFR0       | C1ql2: Complement C1q-like protein 2                               | Dabob Bay           |
| OLUR_00026389     | 2.94                         | 2.30E-02 | Q4ZJM9       | C1ql4: Complement C1q-like protein 4                               | Fidalgo Bay         |
| OLUR_00013332     | 0.88                         | 2.80E-02 | Q62717       | Cadps: Calcium-dependent secretion activator 1                     | Fidalgo Bay         |
| OLUR_00015091     | -0.54                        | 4.80E-02 | P97864       | Casp7: Caspase-7                                                   | Fidalgo Bay         |
| OLUR_00017184     | -2.36                        | 5.56E-03 | P49817       | Cav1: Caveolin-1                                                   | Dabob Bay           |
| OLUR_00001710     | -2.25                        | 5.56E-03 | P32320       | CDA: Cytidine deaminase                                            | Dabob Bay           |
| OLUR_00008459     | -0.68                        | 4.72E-02 | B7Z0W9       | CG42265: Proton channel OtopLc                                     | Dabob Bay           |

|               |       |          |        |                                                              |                           |
|---------------|-------|----------|--------|--------------------------------------------------------------|---------------------------|
| OLUR_00005263 | -1.35 | 2.97E-02 | Q8R4G9 | Chrna3: Neuronal acetylcholine receptor subunit alpha-3      | Dabob Bay                 |
| OLUR_00002411 | -2.08 | 2.21E-05 | A2AX52 | Col6a4: Collagen alpha-4                                     | Dabob Bay                 |
| OLUR_00019549 | 0.61  | 4.82E-02 | P17886 | crn: Protein crooked neck                                    | Dabob Bay                 |
| OLUR_00014282 | 0.73  | 3.62E-02 | Q01406 | CTTN1: Src substrate protein p85                             | Dabob Bay                 |
| OLUR_00025713 | 1.57  | 3.61E-02 | Q64583 | Cyp2b15: Cytochrome P450 2B15                                | Dabob Bay                 |
| OLUR_00012237 | 1.74  | 2.10E-02 | P00178 | CYP2B4: Cytochrome P450 2B4                                  | Dabob Bay,<br>Fidalgo Bay |
| OLUR_00016688 | 3.34  | 9.20E-03 | P24470 | Cyp2c23: Cytochrome P450 2C23                                | Fidalgo Bay               |
| OLUR_00008469 | 1.9   | 3.91E-03 | P10632 | CYP2C8: Cytochrome P450 2C8                                  | Dabob Bay                 |
| OLUR_00024274 | 2.08  | 4.97E-02 | P11714 | Cyp2d9: Cytochrome P450 2D9                                  | Dabob Bay                 |
| OLUR_00026774 | 1.69  | 6.54E-03 | P24461 | CYP2G1: Cytochrome P450 2G1                                  | Dabob Bay                 |
| OLUR_00020244 | 1.41  | 4.97E-02 | P52786 | CYP2J1: Cytochrome P450 2J1                                  | Dabob Bay                 |
| OLUR_00018748 | 2.88  | 1.24E-03 | Q6VVW9 | Cyp2r1: Vitamin D 25-hydroxylase                             | Dabob Bay                 |
| OLUR_00027367 | 2.8   | 1.50E-02 | Q0IIF9 | CYP2U1: Cytochrome P450 2U1                                  | Dabob Bay,<br>Fidalgo Bay |
| OLUR_00003331 | 1.49  | 3.62E-02 | Q7Z449 | CYP2U1: Cytochrome P450 2U1                                  | Dabob Bay                 |
| OLUR_00008711 | 1.03  | 4.80E-02 | Q6NT55 | CYP4F22: Cytochrome P450 4F22                                | Fidalgo Bay               |
| OLUR_00014014 | -0.49 | 4.80E-02 | Q80T85 | Dcaf5: DDB1- and CUL4-associated factor 5                    | Fidalgo Bay               |
| OLUR_00002100 | 2.44  | 1.65E-03 | P49894 | DIO1: Type I iodothyronine deiodinase                        | Dabob Bay                 |
| OLUR_00002101 | 2.02  | 2.80E-02 | O42412 | DIO3: Thyroxine 5-deiodinase                                 | Dabob Bay,<br>Fidalgo Bay |
| OLUR_00021120 | -2.33 | 1.43E-02 | Q9UGM3 | DMBT1: Deleted in malignant brain tumors 1 protein           | Dabob Bay                 |
| OLUR_00005690 | -0.71 | 4.80E-02 | A3R064 | DOK3: Docking protein 3                                      | Fidalgo Bay               |
| OLUR_00012281 | 0.96  | 4.31E-02 | P47823 | EIF2B5: Translation initiation factor eIF-2B subunit epsilon | Dabob Bay                 |
| OLUR_00009872 | -0.86 | 1.10E-02 | P10160 | EIF5A: Eukaryotic translation initiation factor 5A-1         | Fidalgo Bay               |
| OLUR_00012745 | 2.52  | 3.20E-02 | P48035 | FABP4: Fatty acid-binding protein%2C adipocyte               | Dabob Bay,<br>Fidalgo Bay |
| OLUR_00031779 | -2.38 | 3.30E-02 | Q8R508 | Fat3: Protocadherin Fat 3                                    | Fidalgo Bay               |
| OLUR_00028383 | -1.62 | 1.10E-02 | Q3UMF9 | Faxc: Failed axon connections homolog                        | Fidalgo Bay               |
| OLUR_00025242 | -1.16 | 3.40E-02 | O42127 | fgfr3: Fibroblast growth factor receptor 3                   | Fidalgo Bay               |
| OLUR_00021504 | -1.23 | 2.10E-02 | O61491 | Flo1: Flotillin-1                                            | Fidalgo Bay               |
| OLUR_00003007 | -2.12 | 3.70E-02 | Q6AYS4 | Fuca2: Plasma alpha-L-fucosidase                             | Fidalgo Bay               |
| OLUR_00031928 | -3.91 | 2.64E-02 | Q9NUV9 | GIMAP4: GTPase IMAP family member 4                          | Dabob Bay                 |

|               |       |          |        |                                                          |             |
|---------------|-------|----------|--------|----------------------------------------------------------|-------------|
| OLUR_00014547 | 1.86  | 3.61E-02 | P34277 | gsto-2: Probable glutathione transferase omega-2         | Dabob Bay   |
| OLUR_00013606 | 1.9   | 2.43E-02 | Q9Z339 | Gsto1: Glutathione S-transferase omega-1                 | Dabob Bay   |
| OLUR_00000433 | -1.21 | 3.42E-02 | Q9WVI4 | Gucy1a2: Guanylate cyclase soluble subunit alpha-2       | Dabob Bay   |
| OLUR_00018610 | 4.14  | 6.60E-03 | E9QAM5 | Helz2: Helicase with zinc finger domain 2                | Fidalgo Bay |
| OLUR_00013228 | 3.36  | 1.80E-02 | Q9BYK8 | HELZ2: Helicase with zinc finger domain 2                | Fidalgo Bay |
| OLUR_00014040 | 2.7   | 2.25E-02 | D3YXG0 | Hmcn1: Hemicentin-1                                      | Dabob Bay   |
| OLUR_00018477 | 2.24  | 2.70E-02 | A2AJ76 | Hmcn2: Hemicentin-2                                      | Fidalgo Bay |
| OLUR_00001007 | -1.61 | 1.12E-02 | Q9D4G2 | Hsf2bp: Heat shock factor 2-binding protein              | Dabob Bay   |
| OLUR_00011628 | -1.65 | 2.70E-03 | O43301 | HSPA12A: Heat shock 70 kDa protein 12A                   | Dabob Bay   |
| OLUR_00015765 | -1.65 | 4.97E-02 | C8VK14 | hxnY: 2-oxoglutarate-Fe                                  | Dabob Bay   |
| OLUR_00018945 | -0.99 | 4.70E-02 | E9PY46 | Ift140: Intraflagellar transport protein 140 homolog     | Fidalgo Bay |
| OLUR_00026123 | 1.3   | 4.72E-02 | O95069 | KCNK2: Potassium channel subfamily K member 2            | Dabob Bay   |
| OLUR_00010601 | 0.83  | 2.64E-02 | Q9U518 | L-asparaginase                                           | Dabob Bay   |
| OLUR_00002203 | 0.78  | 2.70E-02 | Q61805 | Lbp: Lipopolysaccharide-binding protein                  | Fidalgo Bay |
| OLUR_00002201 | -2.04 | 4.80E-02 | Q96WM9 | lcc2: Laccase-2                                          | Fidalgo Bay |
| OLUR_00007747 | -2.02 | 1.32E-02 | P09849 | LCT: Lactase-phlorizin hydrolase                         | Dabob Bay   |
| OLUR_00004194 | 1.6   | 4.70E-02 | B3EWZ5 | MAM and LDL-receptor class A domain-containing protein 1 | Dabob Bay   |
| OLUR_00019130 | 1.59  | 4.15E-02 | B3EWZ6 | MAM and LDL-receptor class A domain-containing protein 2 | Dabob Bay   |
| OLUR_00016827 | 2.65  | 6.22E-04 | B3EWZ6 | MAM and LDL-receptor class A domain-containing protein 2 | Dabob Bay   |
| OLUR_00005789 | -1.12 | 3.31E-02 | Q16820 | MEP1B: Meprin A subunit beta                             | Dabob Bay   |
| OLUR_00001931 | -1.67 | 4.97E-02 | P08472 | Mesenchyme-specific cell surface glycoprotein            | Dabob Bay   |
| OLUR_00013617 | -1.82 | 2.48E-03 | P08472 | Mesenchyme-specific cell surface glycoprotein            | Dabob Bay   |
| OLUR_00030728 | -2.28 | 5.00E-02 | Q24400 | Mlp84B: Muscle LIM protein Mlp84B                        | Fidalgo Bay |
| OLUR_00011332 | 0.98  | 3.20E-02 | Q95NT6 | mth2: G-protein coupled receptor Mth2                    | Fidalgo Bay |
| OLUR_00009450 | -0.63 | 5.00E-02 | Q62725 | Nfyc: Nuclear transcription factor Y subunit gamma       | Fidalgo Bay |
| OLUR_00014514 | -1.07 | 2.43E-02 | O07552 | nhaX: Stress response protein NhaX                       | Dabob Bay   |
| OLUR_00012374 | 1.55  | 4.80E-02 | Q04721 | NOTCH2: Neurogenic locus notch homolog protein 2         | Fidalgo Bay |
| OLUR_00016842 | 2.03  | 2.43E-02 | Q8CJ26 | Nradd: Death domain-containing membrane protein NRADD    | Dabob Bay   |
| OLUR_00000214 | 0.83  | 2.80E-02 | Q6KEQ9 | PCDH11X: Protocadherin-11 X-linked                       | Fidalgo Bay |
| OLUR_00005074 | 0.71  | 2.25E-02 | Q9Y5K3 | PCYT1B: Choline-phosphate cytidylyltransferase B         | Dabob Bay   |
| OLUR_00004258 | -1.54 | 4.80E-02 | P86854 | Perlucin-like protein                                    | Fidalgo Bay |

|               |       |          |        |                                                                     |             |
|---------------|-------|----------|--------|---------------------------------------------------------------------|-------------|
| OLUR_00000551 | -2.14 | 6.22E-04 | Q96UX3 | pkcR: cAMP-dependent protein kinase regulatory subunit              | Dabob Bay   |
| OLUR_00007563 | 1.19  | 7.87E-03 | P47713 | Pla2g4a: Cytosolic phospholipase A2                                 | Dabob Bay   |
| OLUR_00010581 | 0.93  | 1.80E-02 | Q08BB2 | pm20d1.2: N-fatty-acyl-amino acid synthase/hydrolase PM20D1.2       | Fidalgo Bay |
| OLUR_00030589 | -1.71 | 7.66E-04 | A6NIZ1 | Ras-related protein Rap-1b-like protein                             | Dabob Bay   |
| OLUR_00025558 | 1.4   | 4.22E-02 | P18426 | S-crystallin SL11                                                   | Dabob Bay   |
| OLUR_00027159 | 1.44  | 4.07E-02 | P18426 | S-crystallin SL11                                                   | Dabob Bay   |
| OLUR_00006587 | -0.97 | 3.20E-02 | Q54KA7 | secG: Ankyrin repeat%2C PH and SEC7 domain containing protein secG  | Fidalgo Bay |
| OLUR_00012491 | -0.99 | 2.39E-02 | Q92008 | shha: Sonic hedgehog protein A                                      | Dabob Bay   |
| OLUR_00011339 | 0.98  | 3.54E-02 | B0R0T1 | si:dkey-1811.1: von Willebrand factor A domain-containing protein 8 | Dabob Bay   |
| OLUR_00022480 | -1.04 | 4.40E-02 | Q7ZVK3 | sirt2: NAD-dependent protein deacetylase sirtuin-2                  | Fidalgo Bay |
| OLUR_00016903 | -1.07 | 5.56E-03 | Q7TM99 | Slc16a9: Monocarboxylate transporter 9                              | Dabob Bay   |
| OLUR_00020381 | 1.89  | 5.56E-03 | P43006 | Slc1a2: Excitatory amino acid transporter 2                         | Dabob Bay   |
| OLUR_00022102 | 1.21  | 4.30E-02 | Q9Z2J0 | Slc23a1: Solute carrier family 23 member 1                          | Fidalgo Bay |
| OLUR_00010175 | -2.11 | 2.65E-02 | Q9Z2J0 | Slc23a1: Solute carrier family 23 member 1                          | Dabob Bay   |
| OLUR_00028935 | -1.83 | 4.15E-02 | O35488 | Slc27a2: Very long-chain acyl-CoA synthetase                        | Dabob Bay   |
| OLUR_00004448 | 0.99  | 2.43E-02 | A0JPN2 | Slc39a4: Zinc transporter ZIP4                                      | Dabob Bay   |
| OLUR_00012891 | 0.58  | 3.62E-02 | Q07837 | SLC3A1: Neutral and basic amino acid transport protein rBAT         | Dabob Bay   |
| OLUR_00024710 | -1.02 | 2.10E-02 | Q24524 | sn: Protein singed                                                  | Fidalgo Bay |
| OLUR_00027313 | 0.91  | 3.08E-02 | Q91Z69 | Srgap1: SLIT-ROBO Rho GTPase-activating protein 1                   | Dabob Bay   |
| OLUR_00020487 | 0.57  | 2.85E-02 | Q90ZB9 | stard3: StAR-related lipid transfer protein 3                       | Dabob Bay   |
| OLUR_00010835 | 1.36  | 2.80E-02 | P08842 | STS: Steryl-sulfatase                                               | Fidalgo Bay |
| OLUR_00025850 | -1.5  | 3.67E-02 | Q9HAC7 | SUGCT: Succinate--hydroxymethylglutarate CoA-transferase            | Dabob Bay   |
| OLUR_00002962 | 4.12  | 1.72E-03 | O43704 | SULT1B1: Sulfotransferase family cytosolic 1B member 1              | Dabob Bay   |
| OLUR_00005785 | 3     | 2.94E-04 | Q95JD5 | SULT1B1: Sulfotransferase family cytosolic 1B member 1              | Dabob Bay   |
| OLUR_00000570 | 2.22  | 2.28E-04 | F1QYJ6 | sult6b1: Sulfotransferase 6B1                                       | Dabob Bay   |
| OLUR_00026074 | 3.23  | 6.20E-05 | Q02858 | Tek: Angiotensin-1 receptor                                         | Fidalgo Bay |
| OLUR_00000288 | 1.55  | 4.64E-02 | Q7Z0T3 | Temptin                                                             | Dabob Bay   |
| OLUR_00002071 | -1.87 | 3.20E-02 | P08953 | Tl: Protein toll                                                    | Fidalgo Bay |
| OLUR_00001769 | -1.93 | 4.19E-02 | Q9JIQ8 | Tmprss2: Transmembrane protease serine 2                            | Dabob Bay   |
| OLUR_00020170 | -1.13 | 2.80E-02 | V5NAL9 | Toll-like receptor 4                                                | Fidalgo Bay |
| OLUR_00013623 | 0.37  | 3.20E-02 | P62997 | Tra2b: Transformer-2 protein homolog beta                           | Fidalgo Bay |
| OLUR_00000822 | -1.2  | 2.66E-02 | E1BD59 | TRIM56: E3 ubiquitin-protein ligase TRIM56                          | Dabob Bay   |
| OLUR_00028050 | 2.05  | 4.97E-02 | O74549 | ubc12: NEDD8-conjugating enzyme ubc12                               | Dabob Bay   |

|               |       |          |        |                                                            |             |
|---------------|-------|----------|--------|------------------------------------------------------------|-------------|
| OLUR_00000751 | 0.74  | 2.10E-02 | P62840 | ube2d2: Ubiquitin-conjugating enzyme E2 D2                 | Fidalgo Bay |
| OLUR_00007224 | -1.43 | 1.47E-02 | P74897 | Universal stress protein in QAH/OAS sulfhydrylase 3'region | Dabob Bay   |
| OLUR_00020423 | 1.32  | 2.64E-02 | P41824 | Y-box factor homolog                                       | Dabob Bay   |

944

945

946 **Supplemental Table 3:** Genes that were constitutively expressed in Dabob Bay adults at different levels compared  
 947 to other populations.

| <i>O. lurida</i> gene ID | Gene                                                                        | Uniprot SPID |
|--------------------------|-----------------------------------------------------------------------------|--------------|
| OLUR_00032068            | AADAC: Arylacetamide deacetylase                                            | Q0P5B7       |
| OLUR_00017044            | ABCA1: ATP-binding cassette sub-family A member 1                           | O95477       |
| OLUR_00016317            | ABCA3: ATP-binding cassette sub-family A member 3                           | Q99758       |
| OLUR_00022745            | ABCC3: Canalicular multispecific organic anion transporter 2                | O15438       |
| OLUR_00001814            | Abcf3: ATP-binding cassette sub-family F member 3                           | Q8K268       |
| OLUR_00022318            | Acadl: Long-chain specific acyl-CoA dehydrogenase, C mitochondrial          | P51174       |
| OLUR_00024957            | ADAMTS13: A disintegrin and metalloproteinase with thrombospondin motifs 13 | Q76LX8       |
| OLUR_00000647            | adat1: tRNA-specific adenosine deaminase 1                                  | Q28FE8       |
| OLUR_00022969            | Adgrb1: Adhesion G protein-coupled receptor B1                              | Q3UHD1       |
| OLUR_00031677            | AHCY: Adenosylhomocysteinase                                                | Q3MHL4       |
| OLUR_00031199            | AHCY: Adenosylhomocysteinase                                                | Q3MHL4       |
| OLUR_00011263            | alxA: Alternative oxidase, C mitochondrial                                  | Q9P959       |
| OLUR_00002441            | amy: Alpha-amylase                                                          | P29957       |
| OLUR_00002241            | Anapc4: Anaphase-promoting complex subunit 4                                | Q91W96       |
| OLUR_00029061            | ANGPT2: Angiopoietin-2                                                      | A0A8J8       |
| OLUR_00018984            | ANK1: Ankyrin-1                                                             | P16157       |
| OLUR_00011963            | Ank1: Ankyrin-1                                                             | Q02357       |
| OLUR_00002563            | ANKRD50: Ankyrin repeat domain-containing protein 50                        | Q9ULJ7       |
| OLUR_00002438            | Aoah: Acyloxyacyl hydrolase                                                 | O35298       |
| OLUR_00006201            | Aopep: Aminopeptidase O                                                     | P69527       |
| OLUR_00019355            | ARI1: Probable E3 ubiquitin-protein ligase ARI1                             | Q949V6       |
| OLUR_00022769            | ARSJ: Arylsulfatase J                                                       | Q5FYB0       |
| OLUR_00002790            | Aspartate aminotransferase                                                  | P23034       |
| OLUR_00005128            | Atad5: ATPase family AAA domain-containing protein 5                        | Q4QY64       |
| OLUR_00010015            | ATPsyngamma: ATP synthase subunit gamma, C mitochondrial                    | O01666       |
| OLUR_00004651            | BAG1: BAG family molecular chaperone regulator 1                            | Q99933       |
| OLUR_00025267            | BCO1: Beta, Cbeta-carotene 15, C15'-dioxygenase                             | Q9I993       |
| OLUR_00007641            | Beta-1, C3-glucan-binding protein                                           | Q8N0N3       |
| OLUR_00021318            | Beta-1, C3-glucan-binding protein                                           | Q8N0N3       |
| OLUR_00014400            | Bsx: Brain-specific homeobox protein homolog                                | Q810B3       |
| OLUR_00021824            | BTBD2: BTB/POZ domain-containing protein 2                                  | Q9BX70       |

|               |                                                                            |        |
|---------------|----------------------------------------------------------------------------|--------|
| OLUR_00008482 | C1qc: Complement C1q subcomponent subunit C                                | Q02105 |
| OLUR_00023445 | C1qL2: Complement C1q-like protein 2                                       | Q8CFR0 |
| OLUR_00021130 | C1qL2: Complement C1q-like protein 2                                       | Q8CFR0 |
| OLUR_00023682 | C1qL4: Complement C1q-like protein 4                                       | Q4ZJM9 |
| OLUR_00016044 | C1qL4: Complement C1q-like protein 4                                       | Q4ZJM9 |
| OLUR_00002843 | C1qtnf4: Complement C1q tumor necrosis factor-related protein 4            | Q8R066 |
| OLUR_00029319 | C38H2.2: Glycoprotein-N-acetylgalactosamine 3-beta-galactosyltransferase 1 | Q18515 |
| OLUR_00017184 | Cav1: Caveolin-1                                                           | P49817 |
| OLUR_00006811 | ccdc169: Coiled-coil domain-containing protein 169                         | Q3KPT0 |
| OLUR_00015839 | CD151: CD151 antigen                                                       | P48509 |
| OLUR_00022562 | Cd209e: CD209 antigen-like protein E                                       | Q91ZW7 |
| OLUR_00001710 | CDA: Cytidine deaminase                                                    | P32320 |
| OLUR_00030502 | CEMIP: Cell migration-inducing and hyaluronan-binding protein              | Q8WUJ3 |
| OLUR_00002764 | CHDH: Choline dehydrogenase, C mitochondrial                               | Q8NE62 |
| OLUR_00023309 | Chrna6: Neuronal acetylcholine receptor subunit alpha-6                    | P43143 |
| OLUR_00005622 | CHRNA7: Neuronal acetylcholine receptor subunit alpha-7                    | P54131 |
| OLUR_00009646 | CHRNA9: Neuronal acetylcholine receptor subunit alpha-9                    | Q9PTS8 |
| OLUR_00030281 | chs-2: Chitin synthase chs-2                                               | G5EBQ8 |
| OLUR_00005393 | CLEC17A: C-type lectin domain family 17, C member A                        | Q6ZS10 |
| OLUR_00002411 | Col6a4: Collagen alpha-4                                                   | A2AX52 |
| OLUR_00027711 | COL8A2: Collagen alpha-2                                                   | P25067 |
| OLUR_00027741 | COLEC12: Collectin-12                                                      | Q2LK54 |
| OLUR_00004033 | Collagen alpha-2                                                           | P27393 |
| OLUR_00022598 | Cradd: Death domain-containing protein CRADD                               | O88843 |
| OLUR_00005907 | CYP17A1: Steroid 17-alpha-hydroxylase/17, C20 lyase                        | Q92113 |
| OLUR_00007286 | CYP17A1: Steroid 17-alpha-hydroxylase/17, C20 lyase                        | Q29497 |
| OLUR_00010095 | CYP17A1: Steroid 17-alpha-hydroxylase/17, C20 lyase                        | Q9GMC7 |
| OLUR_00010564 | Ddx39b: Spliceosome RNA helicase Ddx39b                                    | Q63413 |
| OLUR_00009085 | DDX58: Probable ATP-dependent RNA helicase DDX58                           | O95786 |
| OLUR_00021120 | DMBT1: Deleted in malignant brain tumors 1 protein                         | Q9UGM3 |
| OLUR_00012599 | drpr: Protein draper                                                       | Q9W0A0 |
| OLUR_00004620 | drpr: Protein draper                                                       | Q9W0A0 |
| OLUR_00009894 | DUR3: Urea-proton symporter DUR3                                           | F4KD71 |
| OLUR_00008003 | DYNCL1I1: Cytoplasmic dynein 1 light intermediate chain 1                  | Q90828 |
| OLUR_00008906 | DZIP3: E3 ubiquitin-protein ligase DZIP3                                   | Q86Y13 |
| OLUR_00007341 | EGFL8: Epidermal growth factor-like protein 8                              | A5A8Y8 |
| OLUR_00006099 | Eprs: Bifunctional glutamate/proline--tRNA ligase                          | Q8CGC7 |
| OLUR_00021382 | Ercc8: DNA excision repair protein ERCC-8                                  | Q8CFD5 |
| OLUR_00004310 | exog: Nuclease EXOG, C mitochondrial                                       | Q502K1 |
| OLUR_00014579 | F54H12.2: Uncharacterized protein F54H12.2                                 | P34456 |
| OLUR_00017820 | FAM111B: Protein FAM111B                                                   | Q6SJ93 |
| OLUR_00006320 | FAT1: Protocadherin Fat 1                                                  | Q14517 |



|               |                                                           |        |
|---------------|-----------------------------------------------------------|--------|
| OLUR_00029612 | FBN1: Fibrillin-1                                         | P98133 |
| OLUR_00028174 | fbx15: F-box/LRR-repeat protein 15                        | E6ZHJ8 |
| OLUR_00002961 | FBXL4: F-box/LRR-repeat protein 4                         | Q9UKA2 |
| OLUR_00025242 | fgfr3: Fibroblast growth factor receptor 3                | O42127 |
| OLUR_00001763 | G-protein coupled receptor GRL101                         | P46023 |
| OLUR_00017370 | G-protein coupled receptor GRL101                         | P46023 |
| OLUR_00000777 | Gal3st1: Galactosylceramide sulfotransferase              | Q9JHE4 |
| OLUR_00006985 | GALNT13: Polypeptide N-acetylgalactosaminyltransferase 13 | Q8IUC8 |
| OLUR_00009688 | gbpC: Cyclic GMP-binding protein C                        | Q8MVR1 |
| OLUR_00001930 | Gigasins-3a                                               | P86786 |
| OLUR_00031928 | GIMAP4: GTPase IMAP family member 4                       | Q9NUV9 |
| OLUR_00031158 | GIMAP7: GTPase IMAP family member 7                       | Q8NHV1 |
| OLUR_00010854 | Gld: Glucose dehydrogenase [FAD, C quinone]               | P18172 |
| OLUR_00022856 | GLRA2: Glycine receptor subunit alpha-2                   | P23416 |
| OLUR_00011563 | gltX: Glutamate--tRNA ligase                              | A4XA62 |
| OLUR_00030833 | GPx: Glutathione peroxidase                               | G9JJU2 |
| OLUR_00002127 | Heavy metal-binding protein HIP                           | P83425 |
| OLUR_00025178 | Heavy metal-binding protein HIP                           | P83425 |
| OLUR_00011069 | Hebp2: Heme-binding protein 2                             | Q9WU63 |
| OLUR_00011115 | HELZ2: Helicase with zinc finger domain 2                 | Q9BYK8 |
| OLUR_00013228 | HELZ2: Helicase with zinc finger domain 2                 | Q9BYK8 |
| OLUR_00019943 | Helz2: Helicase with zinc finger domain 2                 | E9QAM5 |
| OLUR_00018610 | Helz2: Helicase with zinc finger domain 2                 | E9QAM5 |
| OLUR_00002821 | Hemagglutinin/amebocyte aggregation factor                | Q01528 |
| OLUR_00000188 | Hmcn1: Hemicentin-1                                       | D3YXG0 |
| OLUR_00014040 | Hmcn1: Hemicentin-1                                       | D3YXG0 |
| OLUR_00024505 | HMCN2: Hemicentin-2                                       | Q8NDA2 |
| OLUR_00001007 | Hsf2bp: Heat shock factor 2-binding protein               | Q9D4G2 |
| OLUR_00006095 | HSPA12A: Heat shock 70 kDa protein 12A                    | O43301 |
| OLUR_00030423 | IARS: Isoleucine--tRNA ligase, C cytoplasmic              | P41252 |
| OLUR_00013653 | IFI44: Interferon-induced protein 44                      | Q8TCB0 |
| OLUR_00025548 | IFI44L: Interferon-induced protein 44-like                | Q53G44 |
| OLUR_00009305 | Ift88: Intraflagellar transport protein 88 homolog        | Q61371 |
| OLUR_00006016 | inlI: Internalin I                                        | Q8YA32 |
| OLUR_00020497 | KALRN: Kalirin                                            | O60229 |
| OLUR_00018338 | Kif9: Kinesin-like protein KIF9                           | Q9WV04 |
| OLUR_00003139 | Ky: Kyphoscoliosis peptidase                              | Q8C8H8 |
| OLUR_00015061 | Lectin BRA-3                                              | P07439 |
| OLUR_00022461 | Lectin BRA-3                                              | P07439 |
| OLUR_00022071 | LGMN: Legumain                                            | Q95M12 |
| OLUR_00019596 | LHFPL3: LHFPL tetraspan subfamily member 3 protein        | Q86UP9 |
| OLUR_00022033 | LRP8: Low-density lipoprotein receptor-related protein 8  | Q98931 |

|               |                                                                                   |        |
|---------------|-----------------------------------------------------------------------------------|--------|
| OLUR_00003482 | Lrrc58: Leucine-rich repeat-containing protein 58                                 | Q32NT4 |
| OLUR_00015101 | Lrrc69: Leucine-rich repeat-containing protein 69                                 | Q9D9Q0 |
| OLUR_00018351 | LRRK2: Leucine-rich repeat serine/threonine-protein kinase 2                      | Q5S007 |
| OLUR_00005454 | MAM and LDL-receptor class A domain-containing protein 1                          | B3EWZ5 |
| OLUR_00005238 | Mbtps1: Membrane-bound transcription factor site-1 protease                       | Q9WTZ2 |
| OLUR_00027937 | MDGA2: MAM domain-containing glycosylphosphatidylinositol anchor protein 2        | Q7Z553 |
| OLUR_00009020 | ME1: NADP-dependent malic enzyme                                                  | P40927 |
| OLUR_00010931 | MED34: Mediator of RNA polymerase II transcription subunit 34                     | Q9FT73 |
| OLUR_00006121 | MEGF10: Multiple epidermal growth factor-like domains protein 10                  | Q96KG7 |
| OLUR_00019978 | Megf11: Multiple epidermal growth factor-like domains protein 11                  | Q80T91 |
| OLUR_00024832 | Megf6: Multiple epidermal growth factor-like domains protein 6                    | O88281 |
| OLUR_00021337 | MEGF6: Multiple epidermal growth factor-like domains protein 6                    | O75095 |
| OLUR_00001931 | Mesenchyme-specific cell surface glycoprotein                                     | P08472 |
| OLUR_00019627 | METTL27: Methyltransferase-like protein 27                                        | Q8N6F8 |
| OLUR_00005473 | mfsd1: Major facilitator superfamily domain-containing protein 1                  | Q32LQ6 |
| OLUR_00006189 | mfsd4b: Sodium-dependent glucose transporter 1                                    | A4QN56 |
| OLUR_00030728 | Mlp84B: Muscle LIM protein Mlp84B                                                 | Q24400 |
| OLUR_00014585 | Mme: Neprilysin                                                                   | Q61391 |
| OLUR_00019226 | MPPED1: Metallophosphoesterase domain-containing protein 1                        | O15442 |
| OLUR_00015401 | mpv17: Protein Mpv17                                                              | Q5TZ51 |
| OLUR_00016396 | Mrc1: Macrophage mannose receptor 1                                               | Q61830 |
| OLUR_00005132 | MRPL30: 39S ribosomal protein L30, C mitochondrial                                | Q4R6U7 |
| OLUR_00000053 | Msed_2001: 3-hydroxypropionyl-coenzyme A dehydratase                              | A4YI89 |
| OLUR_00019682 | MTR: Methionine synthase                                                          | Q4JIJ3 |
| OLUR_00006430 | MYORG: Myogenesis-regulating glycosidase                                          | Q6NSJ0 |
| OLUR_00020139 | NOTCH2: Neurogenic locus notch homolog protein 2                                  | Q04721 |
| OLUR_00001182 | Nrg: Neuroglian                                                                   | P20241 |
| OLUR_00007852 | ntr-2: Nematocin receptor 2                                                       | O62169 |
| OLUR_00023494 | Nup98: Nuclear pore complex protein Nup98-Nup96                                   | P49793 |
| OLUR_00012950 | OIH: Ovoinhibitor                                                                 | P10184 |
| OLUR_00009826 | Orct: Organic cation transporter protein                                          | Q9VCA2 |
| OLUR_00014246 | Osbp18: Oxysterol-binding protein-related protein 8                               | B9EJ86 |
| OLUR_00007085 | pats1: Probable serine/threonine-protein kinase pats1                             | Q55E58 |
| OLUR_00010618 | pats1: Probable serine/threonine-protein kinase pats1                             | Q55E58 |
| OLUR_00015409 | PDIA4: Protein disulfide-isomerase A4                                             | P13667 |
| OLUR_00010297 | PELP1: Proline-, C glutamic acid- and leucine-rich protein 1                      | Q1W1Y5 |
| OLUR_00004258 | Perlucin-like protein                                                             | P86854 |
| OLUR_00024841 | Perlucin-like protein                                                             | P86854 |
| OLUR_00031580 | pes1: Pescadillo homolog                                                          | Q7ZY69 |
| OLUR_00020391 | PHF24: PHD finger protein 24                                                      | Q9UPV7 |
| OLUR_00006733 | PHKA1: Phosphorylase b kinase regulatory subunit alpha, C skeletal muscle isoform | P18688 |
| OLUR_00006923 | PI4KA: Phosphatidylinositol 4-kinase alpha                                        | O02811 |



|               |                                                               |        |
|---------------|---------------------------------------------------------------|--------|
| OLUR_00007722 | PIF1: ATP-dependent DNA helicase PIF1                         | Q9H611 |
| OLUR_00000551 | pkaR: cAMP-dependent protein kinase regulatory subunit        | Q96UX3 |
| OLUR_00011428 | PLG: Plasminogen                                              | P06868 |
| OLUR_00000837 | PLG: Plasminogen                                              | Q5R8X6 |
| OLUR_00010581 | pm20d1.2: N-fatty-acyl-amino acid synthase/hydrolase PM20D1.2 | Q08BB2 |
| OLUR_00008613 | Pm20d2: Peptidase M20 domain-containing protein 2             | A3KG59 |
| OLUR_00006738 | PNLIPRP2: Pancreatic lipase-related protein 2                 | A5PK46 |
| OLUR_00003156 | pnr: GATA-binding factor A                                    | P52168 |
| OLUR_00026215 | Polyenoic fatty acid isomerase                                | Q8W257 |
| OLUR_00012063 | Ppfibp1: Liprin-beta-1                                        | Q8C8U0 |
| OLUR_00003429 | Prokineticin Bm8-f                                            | Q8JFX8 |
| OLUR_00006792 | PSMD2: 26S proteasome non-ATPase regulatory subunit 2         | P56701 |
| OLUR_00003910 | Ptchd3: Patched domain-containing protein 3                   | Q0EEE2 |
| OLUR_00000063 | Rab35: Ras-related protein Rab-35                             | Q5U316 |
| OLUR_00030952 | RF_0381: Putative ankyrin repeat protein RF_0381              | Q4UMH6 |
| OLUR_00021095 | RF_0381: Putative ankyrin repeat protein RF_0381              | Q4UMH6 |
| OLUR_00016450 | RF_0381: Putative ankyrin repeat protein RF_0381              | Q4UMH6 |
| OLUR_00005336 | RHBDF1: Inactive rhomboid protein 1                           | A9L8T6 |
| OLUR_00006945 | Rilp11: RILP-like protein 1                                   | D3ZUQ0 |
| OLUR_00006249 | Rnf213: E3 ubiquitin-protein ligase RNF213                    | E9Q555 |
| OLUR_00000762 | rnf8: E3 ubiquitin-protein ligase rnf8                        | Q803C1 |
| OLUR_00017233 | roco5: Probable serine/threonine-protein kinase roco5         | Q1ZXD6 |
| OLUR_00017405 | RpL10: 60S ribosomal protein L10                              | O61231 |
| OLUR_00031369 | RPL17: 60S ribosomal protein L17                              | P37380 |
| OLUR_00015500 | RPS10: 40S ribosomal protein S10                              | O77302 |
| OLUR_00032073 | RpS15Aa: 40S ribosomal protein S15a                           | Q6XIM8 |
| OLUR_00011247 | rsp-7: Probable splicing factor, C arginine/serine-rich 7     | O01159 |
| OLUR_00016425 | ruvb11: RuvB-like 1                                           | Q9DE26 |
| OLUR_00013331 | SACS: Sacsin                                                  | Q9NZJ4 |
| OLUR_00019326 | Sacs: Sacsin                                                  | Q9JLC8 |
| OLUR_00018676 | Scarf1: Scavenger receptor class F member 1                   | Q5ND28 |
| OLUR_00024690 | Sephs2: Selenide, C water dikinase 2                          | P97364 |
| OLUR_00015749 | SKIV2L: Helicase SKI2W                                        | Q15477 |
| OLUR_00010108 | slc16a12: Monocarboxylate transporter 12                      | Q6P2X9 |
| OLUR_00004850 | Slc17a9: Solute carrier family 17 member 9                    | Q8VCL5 |
| OLUR_00007946 | slc22a6-a: Solute carrier family 22 member 6-A                | Q66J54 |
| OLUR_00022102 | Slc23a1: Solute carrier family 23 member 1                    | Q9Z2J0 |
| OLUR_00031094 | Slc4a7: Sodium bicarbonate cotransporter 3                    | Q9R1N3 |
| OLUR_00020573 | Slc7a11: Cystine/glutamate transporter                        | Q9WTR6 |
| OLUR_00006436 | SLC7A5: Large neutral amino acids transporter small subunit 1 | Q01650 |
| OLUR_00000291 | SLC7A9: b                                                     | Q9N1R6 |
| OLUR_00010465 | SMOX: Spermine oxidase                                        | Q9NWM0 |

|               |                                                                         |            |
|---------------|-------------------------------------------------------------------------|------------|
| OLUR_00024710 | sn: Protein singed                                                      | Q24524     |
| OLUR_00029494 | SPBC16D10.01c: Probable assembly chaperone of rpl4                      | Q1MTN8     |
| OLUR_00009680 | SPOCK3: Testican-3                                                      | Q9BQ16     |
| OLUR_00027313 | Srgap1: SLIT-ROBO Rho GTPase-activating protein 1                       | Q91Z69     |
| OLUR_00020487 | stard3: StAR-related lipid transfer protein 3                           | Q90ZB9     |
| OLUR_00016331 | Stx7: Syntaxin-7                                                        | O70439     |
| OLUR_00025850 | SUGCT: Succinate--hydroxymethylglutarate CoA-transferase                | Q9HAC7     |
| OLUR_00007158 | SUPV3L1: ATP-dependent RNA helicase SUPV3L1, C mitochondrial            | Q5ZJT0     |
| OLUR_00001624 | Syt11: Synaptotagmin-11                                                 | Q9R0N3     |
| OLUR_00011931 | TBK1: Serine/threonine-protein kinase TBK1                              | Q9UHD2     |
| OLUR_00006736 | Thap1: THAP domain-containing protein 1                                 | Q5U208     |
| OLUR_00017777 | THAP9: DNA transposase THAP9                                            | Q9H5L6     |
| OLUR_00006555 | Thyrostimulin beta-5 subunit                                            | A0A0F7YZI5 |
| OLUR_00018271 | tmem97: Sigma intracellular receptor 2                                  | Q6DFQ5     |
| OLUR_00026489 | TNKS: Tankyrase-1                                                       | O95271     |
| OLUR_00008939 | TPST2: Protein-tyrosine sulfotransferase 2                              | Q5ZJI0     |
| OLUR_00012411 | TRAF3IP2: Adapter protein CIKS                                          | O43734     |
| OLUR_00004783 | trim71: E3 ubiquitin-protein ligase TRIM71                              | E7FAM5     |
| OLUR_00006456 | TRPM3: Transient receptor potential cation channel subfamily M member 3 | Q9HCF6     |
| OLUR_00007164 | TRPM6: Transient receptor potential cation channel subfamily M member 6 | Q9BX84     |
| OLUR_00002194 | TSNAXIP1: Translin-associated factor X-interacting protein 1            | Q2TAA8     |
| OLUR_00020564 | Tspan33: Tetraspanin-33                                                 | Q8R3S2     |
| OLUR_00017521 | TT10: Laccase-15                                                        | Q84J37     |
| OLUR_00022795 | Tubulin alpha-1 chain                                                   | P02552     |
| OLUR_00017099 | ubiG: Ubiquinone biosynthesis O-methyltransferase                       | Q820B5     |
| OLUR_00012780 | UCP2: Mitochondrial uncoupling protein 2                                | O97562     |
| OLUR_00027608 | unc93a: Protein unc-93 homolog A                                        | Q6DDL7     |
| OLUR_00005827 | VASH2: Tubuliny1-Tyr carboxypeptidase 2                                 | Q86V25     |
| OLUR_00019157 | vps29: Vacuolar protein sorting-associated protein 29                   | Q7ZV68     |
| OLUR_00027063 | VWDE: von Willebrand factor D and EGF domain-containing protein         | Q8N2E2     |
| OLUR_00025976 | Vwde: von Willebrand factor D and EGF domain-containing protein         | Q6DFV8     |
| OLUR_00028052 | WRN: Werner syndrome ATP-dependent helicase                             | Q14191     |
| OLUR_00014688 | xpnpep1: Xaa-Pro aminopeptidase 1                                       | Q54G06     |
| OLUR_00002918 | Xpnpep2: Xaa-Pro aminopeptidase 2                                       | B1AVD1     |
| OLUR_00026221 | ZNF862: Zinc finger protein 862                                         | O60290     |
| OLUR_00021017 | ZNF862: Zinc finger protein 862                                         | O60290     |
| OLUR_00015491 | ZNF878: Zinc finger protein 878                                         | C9JN71     |

948

949

950 **Supplemental Table 4:** Genes that were constitutively expressed in Dabob Bay larvae at different levels compared  
 951 to other populations.

| <i>O. lurida</i> gene ID | Gene                                                          | Uniprot SPID |
|--------------------------|---------------------------------------------------------------|--------------|
| OLUR_00010887            | FMO5: Dimethylaniline monooxygenase [N-oxide-forming] 5       | P49326       |
| OLUR_00013658            | At5g10370: ATP-dependent RNA helicase DEAH1, 2C chloroplastic | F4KGU4       |
| OLUR_00013228            | HELZ2: Helicase with zinc finger domain 2                     | Q9BYK8       |
| OLUR_00004343            | FAT2: Protocadherin Fat 2                                     | Q9NYQ8       |
| OLUR_00016966            | DDB_G0292642: Uncharacterized protein DDB_G0292642            | Q54CX4       |
| OLUR_00022057            | MSMEG_3950: Universal stress protein MSMEG_3950/MSMEI_3859    | A0QZA1       |
| OLUR_00025230            | ghrA: Glyoxylate/hydroxypyruvate reductase A                  | Q8FIT1       |
| OLUR_00000611            | L-proline trans-4-hydroxylase                                 | R9UTQ8       |
| OLUR_00029178            | ucpB: Mitochondrial substrate carrier family protein ucpB     | B0G143       |
| OLUR_00004362            | bmp2: Bone morphogenetic protein 2                            | Q804S2       |
| OLUR_00019157            | vps29: Vacuolar protein sorting-associated protein 29         | Q7ZV68       |
| OLUR_00031354            | DDB_G0287015: TM2 domain-containing protein DDB_G0287015      | Q54KZ0       |
| OLUR_00003900            | AAO: L-ascorbate oxidase                                      | Q40588       |
| OLUR_00004324            | UNC93A: Protein unc-93 homolog A                              | A2VE54       |
| OLUR_00003482            | lrrc58: Leucine-rich repeat-containing protein 58             | Q32NT4       |
| OLUR_00013735            | cep290: Centrosomal protein of 290 kDa                        | P85001       |
| OLUR_00018610            | Helz2: Helicase with zinc finger domain 2                     | E9QAM5       |
| OLUR_00019426            | K02F3.12: Putative ATP-dependent DNA helicase Q1              | Q9TXJ8       |
| OLUR_00022209            | Ectin (Fragment)                                              | B3EWZ8       |
| OLUR_00020882            | UBA6: Ubiquitin-like modifier-activating enzyme 6             | A0AVT1       |
| OLUR_00005664            | ABCC1: Multidrug resistance-associated protein 1              | Q5F364       |
| OLUR_00001519            | HET-E1: Vegetative incompatibility protein HET-E-1            | Q00808       |
| OLUR_00025496            | HSPA12B: Heat shock 70 kDa protein 12B                        | Q96MM6       |
| OLUR_00019143            | NADSYN1: Glutamine-dependent NAD(+) synthetase                | Q5ZMA6       |
| OLUR_00010983            | CLEC3A: C-type lectin domain family 3 member A                | O75596       |

952
